# Supplementary material
Source: PubMed Central journal article supplement (PMC555983)
Supplement: pnas_102_14_5162__2.pdf [file pnas_102_14_5162__2.pdf]

**Table 2. Primers used in this study**

| No. | Name                  | Sequence (5' → 3')                   | Use                                                                                 |
|-----|-----------------------|--------------------------------------|-------------------------------------------------------------------------------------|
| 1   | ntrA-F3               | tacaacaataaaaaatattaagcc             | Amplifying <i>ntrA</i> internal fragment                                            |
| 2   | ntrA-R2               | ataacagaaatctctttgtctgac             | Amplifying <i>ntrA</i> internal fragment                                            |
| 3   | ntrAp-F- <i>KpnI</i>  | catggtaccctattgcaacaaacatagcaacatacg | Amplifying <i>ntrA</i> for complementation plasmid                                  |
| 4   | ntrA-R3- <i>BamHI</i> | gactggatcctcattcaagctgtaattaacc      | Amplifying <i>ntrA</i> for complementation plasmid                                  |
| 5   | ntrA-F4               | gtggattttttatacattaatat              | Confirmation of <i>ntrA</i> deletion                                                |
| 6   | ntrA-R3               | tcattcaagctgtaattaacc                | Confirmation of <i>ntrA</i> deletion                                                |
| 7   | PflaB3'- <i>NdeI</i>  | gattgataatcatatgtcattcctccatg        | Confirmation of <i>ntrA</i> deletion                                                |
| 8   | PflaB5'               | tgctgtcgctcttgggtccgg                | Confirmation of <i>ntrA</i> deletion                                                |
| 9   | M13rev                | caggaacagctatgac                     | Sequencing/screening complementation plasmids                                       |
| 10  | pMFS+rev              | tcttcgctattacgccag                   | Sequencing/screening complementation plasmids                                       |
| 11  | ntrAseqR3             | ttttattgtttgatttgaattgag             | Sequencing/screening complementation plasmids                                       |
| 12  | ntrAseqF2             | tatctaataacagatgctacaagaag           | <i>ntrA</i> sequencing, confirming lack of DNA contamination of RNA (with primer 2) |
| 13  | ntrAseqR1             | agctattcctatTTTTGcaagtatTTCgtc       | <i>ntrA</i> sequencing, confirming <i>ntrA</i> locus (with primer 16)               |
| 14  | ntrAseqF1             | taaaaggaagaaaagaaaagtaa              | <i>ntrA</i> sequencing, RT-PCR of <i>ntrA</i> message                               |
| 15  | ntrAseqR2             | aacgattctattatgttggggacac            | <i>ntrA</i> sequencing, RT-PCR of <i>ntrA</i> message                               |
| 16  | Kan3'out              | aacactggcagagcattac                  | Confirming <i>ntrA</i> locus (with primer 13)                                       |
| 17  | rpoSRT-f              | taaaagatatgCGGtaaag                  | RT-PCR of <i>rpoS</i> message                                                       |
| 18  | rpoSRT-r              | ctgagcaggagataggttgaa                | RT-PCR of <i>rpoS</i> message                                                       |
