# Supplementary material
Source: PubMed Central journal article supplement (PMC555983)
Supplement: pnas_102_14_5162__3.pdf [file pnas_102_14_5162__3.pdf]

**Table 3. Plasmids and strains used in this study**

| <b>Plasmid</b>                         | <b>Description</b>                                                                                                  | <b>Source</b> |
|----------------------------------------|---------------------------------------------------------------------------------------------------------------------|---------------|
| pJLB12A                                | pOK12 + P <sub>flaB</sub> :: <i>kan</i> , Kan <sup>r</sup>                                                          | 1             |
| pJSTJNK                                | pJSTJN + P <sub>flaB</sub> :: <i>kan</i> , Kan <sup>r</sup>                                                         | 2             |
| pMFxnad1                               | pBSV2G + <i>pncA</i> , Gm <sup>r</sup>                                                                              | This study    |
| pMFp54nad                              | pMFxnad1 + <i>ntrA</i> , Gm <sup>r</sup>                                                                            | This study    |
| pKFSS1                                 | pBSV2 ΔP <sub>flgB</sub> :: <i>kan</i> + P <sub>flgB</sub> :: <i>aadA</i> , Sm <sup>r</sup>                         | 3             |
| pMFS+                                  | pMFxnad1 Δ( <i>pncA</i> , P <sub>flgB</sub> :: <i>aacC1</i> ) + P <sub>flgB</sub> :: <i>aadA</i> , Sm <sup>r</sup>  | This study    |
| pMFSp54                                | pMFp54nad Δ( <i>pncA</i> , P <sub>flgB</sub> :: <i>aacC1</i> ) + P <sub>flgB</sub> :: <i>aadA</i> , Sm <sup>r</sup> | This study    |
| lp25::P <sub>flaB</sub> - <i>aacC1</i> | A3 lp25 <i>bbe05</i> ::(P <sub>flaB</sub> :: <i>aacC1</i> ), Gm <sup>r</sup>                                        | 4             |
| <b>Strain</b>                          |                                                                                                                     |               |
| B31-A3                                 | Clonal derivative of B31                                                                                            | 5             |
| A3 <i>ntrA</i>                         | B31-A3 <i>ntrA</i> ::(P <sub>flaB</sub> :: <i>kan</i> )                                                             | This study    |
| A3 <i>rpoS</i>                         | B31-A3 <i>rpoS</i> ::(P <sub>flaB</sub> :: <i>kan</i> )                                                             | 5             |
| A3-Gm                                  | B31-A3 (lp25::P <sub>flaB</sub> - <i>aacC1</i> )                                                                    | This study    |
| A3 <i>ntrA</i> -Gm                     | A3 <i>ntrA</i> (lp25::P <sub>flaB</sub> - <i>aacC1</i> )                                                            | This study    |
| <i>ntrA</i> -comp                      | A3 <i>ntrA</i> -Gm (pMFSp54)                                                                                        | This study    |
| <i>ntrA</i> -VC                        | A3 <i>ntrA</i> -Gm (pMFS+)                                                                                          | This study    |

1. Bono, J. L., Elias, A. F., Kupko, J. J., 3rd, Stevenson, B., Tilly, K. & Rosa, P. (2000) *J. Bacteriol.* **182**, 2445-2452.
2. Treglown, J. S. (2004) Ph.D. Thesis (Univ. of Georgia, Athens).
3. Frank, K. L., Bundle, S. F., Kresge, M. E., Eggers, C. H. & Samuels, D. S. (2003) *J. Bacteriol.* **185**, 6723-6727.
4. Grimm, D., Eggers, C. H., Caimano, M. J., Tilly, K., Stewart, P. E., Elias, A. F., Radolf, J. D. & Rosa, P. A. (2004) *Infect. Immun.* **72**, 5938-5946.
5. Elias, A. F., Stewart, P. E., Grimm, D., Caimano, M. J., Eggers, C. H., Tilly, K., Bono, J. L., Akins, D. R., Radolf, J. D., Schwan, T. G., *et al.* (2002) *Infect. Immun.* **70**, 2139-2150.
