# Supplementary material
Source: PubMed Central journal article supplement (PMC555983)
Supplement: pnas_102_14_5162__4.pdf [file pnas_102_14_5162__4.pdf]

**Table 4. Genes with significantly altered expression only in the *ntrA* mutant relative to WT (regulatory group 1).**

| ORF    | Name       | Description                                                        | Ratio,<br><i>ntrA</i> /WT | SE*  | $P^{\dagger}$ | Main role                                      | Subrole                                               | Potential<br>to cross-<br>hybridize <sup>‡</sup> | Putative<br>promoter <sup>§</sup> | Paralog.<br>family<br>no. | Rank <sup>¶</sup> | Taqman<br>ratio <sup>  </sup> |
|--------|------------|--------------------------------------------------------------------|---------------------------|------|---------------|------------------------------------------------|-------------------------------------------------------|--------------------------------------------------|-----------------------------------|---------------------------|-------------------|-------------------------------|
| BB0001 |            | Hypothetical protein                                               | 1.40                      | 0.09 | 0.001         | Hypothetical proteins                          |                                                       |                                                  | N                                 |                           | 132               |                               |
| BB0002 |            | $\beta$ - <i>N</i> -acetylhexosaminidase,<br>putative              | 1.93                      | 0.32 | 0.008         | Energy metabolism                              | Biosynthesis and<br>degradation of<br>polysaccharides |                                                  | N                                 | 21                        | 237               | 1.22                          |
| BB0003 |            | Hypothetical protein                                               | 1.74                      | 0.24 | 0.009         | Hypothetical proteins                          |                                                       |                                                  | N                                 |                           | 217               | 1.31                          |
| BB0004 | femD       | Phosphoglucomutase                                                 | 1.69                      | 0.13 | 1E-04         | Energy metabolism                              | Biosynthesis and<br>degradation of<br>polysaccharides |                                                  | Y                                 |                           | 208               |                               |
| BB0005 | trsA       | Tryptophanyl-tRNA synthetase                                       | 1.61                      | 0.18 | 0.004         | Protein synthesis                              | tRNA aminoacylation                                   |                                                  | Y                                 |                           | 193               |                               |
| BB0007 |            | Hypothetical protein                                               | 2.18                      | 0.33 | 0.002         | Hypothetical proteins                          |                                                       |                                                  | Y                                 |                           | 251               |                               |
| BB0011 |            | Hypothetical protein                                               | 1.70                      | 0.17 | 0.001         | Hypothetical proteins                          |                                                       |                                                  | Y                                 |                           | 209               |                               |
| BB0018 |            | Conserved hypothetical protein                                     | 0.66                      | 0.04 | 7E-05         | Hypothetical proteins - Conserved<br>Conserved |                                                       |                                                  | Y                                 | 45                        | 75                |                               |
| BB0021 |            | <i>S</i> -adenosylmethionine: tRNA<br>ribosyltransferase-isomerase | 0.74                      | 0.02 | 9E-07         | Protein synthesis                              | tRNA and rRNA base<br>modification                    |                                                  | Y                                 |                           | 119               |                               |
| BB0022 | ruvB       | Holliday junction DNA helicase                                     | 0.69                      | 0.04 | 1E-04         | DNA metabolism                                 | DNA replication,<br>recombination, and<br>repair      |                                                  | Y                                 |                           | 96                |                               |
| BB0023 | ruvA       | Holliday junction DNA helicase                                     | 2.05                      | 0.22 | 3E-04         | DNA metabolism                                 | DNA replication,<br>recombination, and<br>repair      |                                                  | Y                                 |                           | 249               |                               |
| BB0024 |            | hypothetical protein                                               | 1.72                      | 0.23 | 0.008         | Hypothetical proteins                          |                                                       |                                                  | Y                                 |                           | 214               |                               |
| BB0031 | lepB-<br>2 | Signal peptidase I                                                 | 1.86                      | 0.29 | 0.006         | Protein fate                                   | Protein and peptide<br>secretion and<br>trafficking   |                                                  | N                                 |                           | 233               |                               |
| BB0033 | smpB       | Small protein                                                      | 1.52                      | 0.22 | 0.028         | Unknown function                               | General                                               |                                                  | N                                 |                           | 168               |                               |
| BB0035 | parC       | DNA topoisomerase IV                                               | 1.56                      | 0.26 | 0.04          | DNA metabolism                                 | DNA replication,<br>recombination, and<br>repair      |                                                  | N                                 | 31                        | 180               |                               |
| BB0038 |            | hypothetical protein                                               | 0.74                      | 0.04 | 0.001         | Hypothetical proteins                          |                                                       |                                                  | Y                                 |                           | 117               |                               |

|        |      |                                                                                       |      |      |       |                                                |                                                      |   |    |     |      |
|--------|------|---------------------------------------------------------------------------------------|------|------|-------|------------------------------------------------|------------------------------------------------------|---|----|-----|------|
| BB0048 |      | hypothetical protein                                                                  | 1.94 | 0.15 | 1E-04 | Hypothetical proteins                          |                                                      | N |    | 239 |      |
| BB0051 |      | Conserved hypothetical integral membrane protein                                      | 1.67 | 0.23 | 0.012 | Hypothetical proteins - Conserved<br>Conserved |                                                      | Y | 47 | 205 |      |
| BB0052 | spoU | SpoU protein                                                                          | 1.95 | 0.24 | 0.002 | Protein synthesis                              | tRNA and rRNA base modification                      | N |    | 240 | 1.01 |
| BB0060 |      | Conserved hypothetical protein                                                        | 1.40 | 0.10 | 0.004 | Hypothetical proteins - Conserved<br>Conserved |                                                      | Y |    | 129 |      |
| BB0068 |      | Conserved hypothetical protein                                                        | 1.38 | 0.09 | 0.001 | Hypothetical proteins - Conserved<br>Conserved |                                                      | N | 97 | 127 |      |
| BB0072 |      | hypothetical protein                                                                  | 1.98 | 0.23 | 0.001 | Hypothetical proteins                          |                                                      | N |    | 243 |      |
| BB0074 | prfB | Peptide chain release factor 2, programmed frameshift                                 | 1.55 | 0.25 | 0.036 | Protein synthesis                              | Translation factors                                  | Y | 43 | 176 |      |
| BB0076 | ftsY | Signal recognition particle-docking protein FtsY                                      | 1.85 | 0.17 | 9E-04 | Protein fate                                   | Protein and peptide secretion and trafficking        | Y | 10 | 231 |      |
| BB0080 |      | ABC transporter, ATP-binding protein                                                  | 1.43 | 0.09 | 6E-04 | Transport and binding proteins                 | Unknown substrate                                    | N | 4  | 139 |      |
| BB0099 |      | Conserved hypothetical protein                                                        | 1.50 | 0.16 | 0.009 | Hypothetical proteins - Conserved<br>Conserved |                                                      | Y |    | 158 |      |
| BB0102 |      | hypothetical protein                                                                  | 1.80 | 0.10 | 1E-05 | Hypothetical proteins                          |                                                      | Y |    | 224 |      |
| BB0109 | fadA | Acetyl-CoA C-acetyltransferase                                                        | 0.53 | 0.03 | 1E-05 | Fatty acid and phospholipid metabolism         | Biosynthesis                                         | N |    | 10  | 0.87 |
| BB0118 |      | Zinc protease, putative                                                               | 1.75 | 0.25 | 0.009 | Protein fate                                   | Degradation of proteins, peptides, and glycopeptides | Y |    | 220 |      |
| BB0119 | cdsA | Phosphatidate cytidyltransferase, authentic frameshift                                | 1.44 | 0.09 | 5E-04 | Fatty acid and phospholipid metabolism         | Biosynthesis                                         | N |    | 142 |      |
| BB0139 |      | hypothetical protein                                                                  | 1.42 | 0.13 | 0.006 | Hypothetical proteins                          |                                                      | Y |    | 135 |      |
| BB0143 |      | Conserved hypothetical protein                                                        | 1.81 | 0.21 | 0.003 | Hypothetical proteins - Conserved<br>Conserved |                                                      | N |    | 226 |      |
| BB0144 | proX | Glycine betaine, L-proline ABC transporter, glycine/betaine/L-proline-binding protein | 1.41 | 0.11 | 0.006 | Transport and binding proteins                 | Amino acids, peptides and amines                     | Y |    | 134 |      |
| BB0149 | fliD | Flagellar hook-associated protein 2                                                   | 1.49 | 0.12 | 0.004 | Cellular processes                             | Chemotaxis and motility                              | Y |    | 157 |      |
| BB0169 | infA | Translation initiation factor 1                                                       | 1.39 | 0.09 | 0.002 | Protein synthesis                              | Translation factors                                  | N |    | 128 |      |

|        |        |                                                                        |      |      |       |                                                            |                                                      |   |    |     |
|--------|--------|------------------------------------------------------------------------|------|------|-------|------------------------------------------------------------|------------------------------------------------------|---|----|-----|
| BB0200 | ddlA   | D-alanine--D-alanine ligase                                            | 0.67 | 0.04 | 7E-04 | Cell envelope                                              | Biosynthesis of murein sacculus and peptidoglycan    | Y |    | 79  |
| BB0209 |        | hypothetical protein                                                   | 1.32 | 0.06 | 3E-04 | Hypothetical proteins                                      |                                                      | N |    | 122 |
| BB0212 |        | hypothetical protein                                                   | 2.28 | 0.12 | 7E-06 | Hypothetical proteins                                      |                                                      | N |    | 254 |
| BB0216 | pstC   | Phosphate ABC transporter, permease protein                            | 1.73 | 0.25 | 0.009 | Transport and binding proteins                             | Anions                                               | Y | 41 | 216 |
| BB0220 | alaS   | Alanyl-tRNA synthetase                                                 | 1.66 | 0.21 | 0.008 | Protein synthesis                                          | tRNA aminoacylation                                  | N |    | 203 |
| BB0223 |        | hypothetical protein                                                   | 0.75 | 0.03 | 2E-05 | Hypothetical proteins                                      |                                                      | N | 40 | 120 |
| BB0224 |        | Lipoprotein, putative                                                  | 1.52 | 0.11 | 3E-04 | Cell envelope                                              | Other                                                | Y | 40 | 166 |
| BB0244 |        | Conserved hypothetical protein                                         | 2.01 | 0.24 | 7E-04 | Hypothetical proteins - Conserved                          | Conserved                                            | Y |    | 244 |
| BB0248 | pepF   | Oligoendopeptidase F                                                   | 1.62 | 0.22 | 0.013 | Protein fate                                               | Degradation of proteins, peptides, and glycopeptides | N |    | 195 |
| BB0260 |        | hypothetical protein                                                   | 1.43 | 0.05 | 1E-05 | Hypothetical proteins                                      |                                                      | N |    | 140 |
| BB0261 |        | hypothetical protein                                                   | 1.44 | 0.05 | 2E-06 | Hypothetical proteins                                      |                                                      | N |    | 143 |
| BB0270 | flhF   | Flagellar-associated GTP-binding protein                               | 0.65 | 0.05 | 0.002 | Cellular processes                                         | Chemotaxis and motility                              | N | 10 | 64  |
| BB0275 | fliP   | Flagellar biosynthesis protein                                         | 1.45 | 0.14 | 0.006 | Cellular processes                                         | Chemotaxis and motility                              | N |    | 150 |
| BB0296 | hslV   | Heat shock protein                                                     | 0.55 | 0.04 | 8E-05 | Protein fate                                               | Protein folding and stabilization                    | Y |    | 14  |
| BB0297 |        | Smg protein                                                            | 0.62 | 0.07 | 0.006 | Unknown function                                           | General                                              | N |    | 42  |
| BB0309 |        | hypothetical protein                                                   | 1.50 | 0.07 | 2E-05 | Hypothetical proteins                                      |                                                      | N |    | 159 |
| BB0314 | ispB   | Octaprenyl-diphosphate synthase                                        | 1.46 | 0.09 | 5E-04 | Biosynthesis of cofactors, prosthetic groups, and carriers | Menaquinone and ubiquinone                           | N |    | 152 |
| BB0329 | oppA-2 | Oligopeptide ABC transporter, periplasmic oligopeptide-binding protein | 1.45 | 0.15 | 0.01  | Transport and binding proteins                             | Amino acids, peptides and amines                     | N | 37 | 151 |
| BB0333 | oppC-1 | Oligopeptide ABC transporter, permease protein                         | 1.41 | 0.08 | 4E-04 | Transport and binding proteins                             | Amino acids, peptides and amines                     | Y | 41 | 133 |
| BB0353 |        | hypothetical protein                                                   | 1.61 | 0.15 | 8E-04 | Hypothetical proteins                                      |                                                      | N |    | 192 |
| BB0354 |        | hypothetical protein                                                   | 2.04 | 0.56 | 0.033 | Hypothetical proteins                                      |                                                      | N |    | 248 |

|        |      |                                                          |      |      |       |                                   |                                               |   |    |     |      |
|--------|------|----------------------------------------------------------|------|------|-------|-----------------------------------|-----------------------------------------------|---|----|-----|------|
| BB0357 |      | hypothetical protein                                     | 1.53 | 0.19 | 0.016 | Hypothetical proteins             |                                               | N |    | 174 |      |
| BB0397 |      | hypothetical protein                                     | 1.58 | 0.15 | 0.004 | Hypothetical proteins             |                                               | N |    | 187 |      |
| BB0404 |      | hypothetical protein                                     | 0.70 | 0.05 | 0.003 | Hypothetical proteins             |                                               | N |    | 103 |      |
| BB0406 |      | hypothetical protein                                     | 0.71 | 0.02 | 2E-08 | Hypothetical proteins             |                                               | Y | 35 | 109 |      |
| BB0407 | manA | Mannose-6-phosphate isomerase                            | 1.60 | 0.17 | 0.005 | Energy metabolism                 | Sugars                                        | Y |    | 190 |      |
| BB0412 |      | hypothetical protein                                     | 1.76 | 0.14 | 1E-04 | Hypothetical proteins             |                                               | N |    | 221 |      |
| BB0416 | traB | Pheromone shutdown protein                               | 1.71 | 0.12 | 8E-05 | Regulatory functions              | Other                                         | Y |    | 211 | 0.90 |
| BB0420 |      | Sensory transduction histidine kinase/response regulator | 1.65 | 0.17 | 0.003 | Regulatory functions              | Other                                         | Y | 14 | 202 | 0.85 |
| BB0427 |      | Conserved hypothetical protein                           | 0.50 | 0.03 | 2E-07 | Hypothetical proteins - Conserved | Conserved                                     | N |    | 6   | 0.63 |
| BB0432 |      | hypothetical protein                                     | 1.36 | 0.07 | 5E-04 | Hypothetical proteins             |                                               | Y |    | 125 |      |
| BB0437 | dnaA | Chromosomal replication initiator protein                | 1.63 | 0.16 | 0.002 | DNA metabolism                    | DNA replication, recombination, and repair    | Y |    | 199 |      |
| BB0441 | rnpA | Ribonuclease P protein component                         | 1.57 | 0.18 | 0.005 | Transcription                     | Degradation of RNA                            | N |    | 182 |      |
| BB0449 |      | Conserved hypothetical protein                           | 1.62 | 0.24 | 0.013 | Hypothetical proteins - Conserved | Conserved                                     | N |    | 196 |      |
| BB0450 | ntrA | RNA polymerase sigma-54 factor                           | 0.74 | 0.04 | 1E-03 | Transcription                     | DNA-dependent RNA polymerase                  | Y |    | 116 |      |
| BB0451 |      | Chromate transport protein, putative                     | 0.70 | 0.08 | 0.019 | Transport and binding proteins    | Other                                         | Y | 29 | 99  |      |
| BB0456 |      | hypothetical protein                                     | 0.64 | 0.09 | 0.018 | Hypothetical proteins             |                                               | Y |    | 55  |      |
| BB0457 | uvrC | Excinuclease ABC, subunit C                              | 1.43 | 0.13 | 0.006 | DNA metabolism                    | DNA replication, recombination, and repair    | N |    | 138 |      |
| BB0461 | dnaX | DNA polymerase III, subunits gamma and tau               | 1.90 | 0.25 | 0.003 | DNA metabolism                    | DNA replication, recombination, and repair    | N |    | 236 |      |
| BB0465 |      | hypothetical protein                                     | 2.03 | 0.18 | 1E-04 | Hypothetical proteins             |                                               | N |    | 247 |      |
| BB0469 | isp  | Signal peptidase II                                      | 1.62 | 0.19 | 0.005 | Protein fate                      | Protein and peptide secretion and trafficking | N |    | 194 |      |

|        |       |                                                                              |      |      |       |                                                    |                                                      |   |     |     |      |
|--------|-------|------------------------------------------------------------------------------|------|------|-------|----------------------------------------------------|------------------------------------------------------|---|-----|-----|------|
| BB0473 |       | Conserved hypothetical integral membrane protein                             | 1.51 | 0.19 | 0.018 | Hypothetical proteins - Conserved<br>Conserved     |                                                      | Y | 56  | 165 |      |
| BB0515 | trxB  | Thioredoxin reductase                                                        | 0.56 | 0.09 | 0.013 | Energy metabolism                                  | Electron transport                                   | Y |     | 17  | 0.48 |
| BB0534 | exoA  | Exodeoxyribonuclease III                                                     | 1.98 | 0.25 | 0.002 | DNA metabolism                                     | DNA replication, recombination, and repair           | Y |     | 242 | 1.12 |
| BB0535 |       | hypothetical protein                                                         | 1.86 | 0.25 | 0.004 | Hypothetical proteins                              |                                                      | Y |     | 234 |      |
| BB0536 |       | Zinc protease, putative                                                      | 1.72 | 0.29 | 0.02  | Protein fate                                       | Degradation of proteins, peptides, and glycopeptides | N |     | 215 |      |
| BB0537 |       | Conserved hypothetical protein                                               | 1.96 | 0.44 | 0.023 | Hypothetical proteins - Conserved<br>Conserved     |                                                      | N |     | 241 |      |
| BB0538 |       | Conserved hypothetical protein                                               | 1.61 | 0.22 | 0.015 | Hypothetical proteins - Conserved<br>Conserved     |                                                      | Y | 125 | 191 |      |
| BB0546 |       | hypothetical protein                                                         | 1.50 | 0.10 | 1E-04 | Hypothetical proteins                              |                                                      | N |     | 160 |      |
| BB0562 |       | hypothetical protein                                                         | 1.79 | 0.24 | 0.006 | Hypothetical proteins                              |                                                      | Y | 35  | 223 |      |
| BB0571 | smbA  | Uridylate kinase                                                             | 1.45 | 0.13 | 0.005 | Purines, pyrimidines, nucleosides, and nucleotides | Nucleotide and nucleoside interconversions           | N |     | 146 |      |
| BB0574 |       | Conserved hypothetical integral membrane protein                             | 1.49 | 0.18 | 0.016 | Hypothetical proteins - Conserved<br>Conserved     |                                                      | Y |     | 156 |      |
| BB0580 |       | Conserved hypothetical integral membrane protein                             | 0.73 | 0.05 | 0.001 | Hypothetical proteins - Conserved<br>Conserved     |                                                      | N |     | 113 |      |
| BB0585 | murD  | UDP- <i>N</i> -acetylmuramoylalanine-- <i>D</i> -glutamate ligase            | 1.56 | 0.19 | 0.01  | Cell envelope                                      | Biosynthesis of murein sacculus and peptidoglycan    | Y |     | 179 |      |
| BB0588 | pfs-2 | 5-methylthioadenosine/ <i>S</i> -adenosylhomocysteine nucleosidase, putative | 0.62 | 0.05 | 7E-04 | Purines, pyrimidines, nucleosides, and nucleotides | Salvage of nucleosides and nucleotides               | Y | 26  | 39  |      |
| BB0589 | pta   | Phosphate acetyltransferase                                                  | 1.54 | 0.09 | 9E-05 | Energy metabolism                                  | Fermentation                                         | N |     | 175 |      |
| BB0592 |       | hypothetical protein                                                         | 0.67 | 0.05 | 9E-04 | Hypothetical proteins                              |                                                      | N |     | 76  |      |
| BB0604 | lctP  | L-lactate permease                                                           | 1.43 | 0.12 | 0.005 | Transport and binding proteins                     | Carbohydrates, organic alcohols, and acids           | N |     | 141 |      |
| BB0612 | clpX  | ATP-dependent Clp protease, subunit X                                        | 0.62 | 0.05 | 0.001 | Protein fate                                       | Degradation of proteins, peptides, and glycopeptides | Y | 127 | 44  |      |

|        |        |                                                                    |      |      |       |                                        |                                                      |   |     |     |      |
|--------|--------|--------------------------------------------------------------------|------|------|-------|----------------------------------------|------------------------------------------------------|---|-----|-----|------|
| BB0613 | lon-2  | ATP-dependent protease LA                                          | 2.02 | 0.28 | 0.002 | Protein fate                           | Degradation of proteins, peptides, and glycopeptides | Y | 22  | 246 | 1.09 |
| BB0626 |        | Small primase-like protein                                         | 1.63 | 0.14 | 2E-04 | Unknown function                       | General                                              | Y |     | 200 |      |
| BB0629 | fruA-2 | PTS system, fructose-specific IABC component                       | 1.85 | 0.21 | 0.002 | Transport and binding proteins         | Carbohydrates, organic alcohols, and acids           | N | 19  | 232 |      |
| BB0637 | nhaC-1 | Na <sup>+</sup> /H <sup>+</sup> antiporter                         | 1.48 | 0.16 | 0.008 | Transport and binding proteins         | Cations                                              | Y | 135 | 155 |      |
| BB0646 |        | Hydrolase, alpha/beta fold family                                  | 1.43 | 0.06 | 1E-05 | Hypothetical proteins                  |                                                      | N |     | 137 |      |
| BB0647 | fur    | Ferric uptake regulation protein                                   | 1.47 | 0.16 | 0.013 | Regulatory functions                   | Other                                                | N |     | 153 | 1.48 |
| BB0653 | secF   | Protein-export membrane protein                                    | 1.83 | 0.28 | 0.007 | Protein fate                           | Protein and peptide secretion and trafficking        | Y | 136 | 230 |      |
| BB0669 | cheA-2 | Chemotaxis histidine kinase                                        | 1.58 | 0.10 | 9E-05 | Cellular processes                     | Chemotaxis and motility                              | N | 134 | 186 |      |
| BB0675 |        | hypothetical protein                                               | 1.51 | 0.20 | 0.024 | Hypothetical proteins                  |                                                      | Y |     | 163 |      |
| BB0677 | mgIA   | Ribose/galactose ABC transporter, ATP-binding protein              | 0.70 | 0.06 | 0.007 | Transport and binding proteins         | Carbohydrates, organic alcohols, and acids           | Y | 4   | 100 |      |
| BB0678 | rbsC-1 | Ribose/galactose ABC transporter, permease protein                 | 0.72 | 0.04 | 1E-04 | Transport and binding proteins         | Carbohydrates, organic alcohols, and acids           | Y | 130 | 111 |      |
| BB0686 |        | Mevalonate pyrophosphate decarboxylase                             | 0.71 | 0.02 | 1E-06 | Fatty acid and phospholipid metabolism | Biosynthesis                                         | Y |     | 108 |      |
| BB0697 |        | Conserved hypothetical protein                                     | 1.45 | 0.16 | 0.015 | Hypothetical proteins - Conserved      | Conserved                                            | N |     | 148 |      |
| BB0710 | dnaG   | DNA primase                                                        | 0.68 | 0.04 | 4E-04 | DNA metabolism                         | DNA replication, recombination, and repair           | N |     | 89  |      |
| BB0711 |        | hypothetical protein                                               | 0.62 | 0.07 | 0.006 | Hypothetical proteins                  |                                                      | N |     | 45  |      |
| BB0713 |        | Conserved hypothetical protein                                     | 1.56 | 0.05 | 8E-07 | Hypothetical proteins - Conserved      | Conserved                                            | Y |     | 181 |      |
| BB0721 |        | CDP-diacylglycerol--glycerol-3-phosphate 3-phosphatidyltransferase | 1.51 | 0.14 | 0.005 | Fatty acid and phospholipid metabolism | Biosynthesis                                         | Y |     | 162 |      |
| BB0726 | ylxH-3 | MinD-related ATP-binding protein                                   | 0.69 | 0.06 | 0.006 | Cellular processes                     | Cell division                                        | Y | 32  | 95  |      |

|        |      |                                                             |      |      |       |                                                    |                                                      |   |     |     |      |
|--------|------|-------------------------------------------------------------|------|------|-------|----------------------------------------------------|------------------------------------------------------|---|-----|-----|------|
| BB0736 |      | hypothetical protein                                        | 1.45 | 0.13 | 0.005 | Hypothetical proteins                              |                                                      | N |     | 147 |      |
| BB0740 |      | Conserved hypothetical protein                              | 1.53 | 0.15 | 0.004 | Hypothetical proteins - Conserved<br>Conserved     |                                                      | Y |     | 171 |      |
| BB0774 | flgG | Flagellar basal-body rod protein                            | 1.68 | 0.16 | 0.002 | Cellular processes                                 | Chemotaxis and motility                              | Y | 78  | 206 |      |
| BB0775 | flhO | Flagellar hook-basal body complex protein                   | 1.71 | 0.33 | 0.031 | Cellular processes                                 | Chemotaxis and motility                              | N | 78  | 210 |      |
| BB0781 | obg  | GTP-binding protein                                         | 1.71 | 0.14 | 6E-05 | Cellular processes                                 | Other                                                | Y |     | 213 |      |
| BB0788 |      | Conserved hypothetical protein                              | 0.62 | 0.03 | 1E-06 | Hypothetical proteins - Conserved<br>Conserved     |                                                      | Y |     | 43  |      |
| BB0793 | tmk  | Thymidylate kinase                                          | 1.48 | 0.18 | 0.016 | Purines, pyrimidines, nucleosides, and nucleotides | Nucleotide and nucleoside interconversions           | Y |     | 154 |      |
| BB0797 | mutS | DNA mismatch repair protein                                 | 1.76 | 0.22 | 0.004 | DNA metabolism                                     | DNA replication, recombination, and repair           | Y | 118 | 222 | 0.80 |
| BB0820 |      | hypothetical protein                                        | 2.13 | 0.13 | 1E-06 | Hypothetical proteins                              |                                                      | Y |     | 250 |      |
| BB0821 | miaA | 2-methylthio-N6-isopentyladenosine tRNA modification enzyme | 1.53 | 0.16 | 0.006 | Protein synthesis                                  | tRNA and rRNA base modification                      | N |     | 173 |      |
| BB0827 | hrpA | ATP-dependent helicase                                      | 1.57 | 0.18 | 0.01  | DNA metabolism                                     | DNA replication, recombination, and repair           | Y |     | 184 |      |
| BB0830 | sbcC | Exonuclease SbcC                                            | 1.71 | 0.14 | 2E-04 | DNA metabolism                                     | DNA replication, recombination, and repair           | N |     | 212 |      |
| BB0832 |      | Lipoprotein, putative                                       | 1.81 | 0.31 | 0.014 | Cell envelope                                      | Other                                                | Y |     | 228 |      |
| BB0834 | clpC | ATP-dependent Clp protease, subunit C                       | 1.53 | 0.14 | 0.002 | Protein fate                                       | Degradation of proteins, peptides, and glycopeptides | Y | 23  | 170 | 0.98 |
| BB0837 | uvrA | Excinuclease ABC, subunit A                                 | 0.59 | 0.06 | 0.001 | DNA metabolism                                     | DNA replication, recombination, and repair           | Y |     | 24  |      |
| BB0847 |      | hypothetical protein                                        | 1.53 | 0.09 | 1E-04 | Hypothetical proteins                              |                                                      | N |     | 172 |      |
| BBA07  |      | ChpAI protein, putative                                     | 0.49 | 0.15 | 0.047 | Regulatory functions                               | Other                                                | N |     | 3   | 0.08 |
| BBA11  |      | Conserved hypothetical protein                              | 0.67 | 0.06 | 0.003 | Hypothetical proteins - Conserved<br>Conserved     |                                                      | Y | 142 | 80  |      |
| BBA20  |      | Plasmid partition protein, putative                         | 1.89 | 0.37 | 0.018 | Cellular processes                                 | Cell division                                        | N | 32  | 235 |      |

|       |      |                                                   |      |      |       |                                                |                                               |   |     |     |      |
|-------|------|---------------------------------------------------|------|------|-------|------------------------------------------------|-----------------------------------------------|---|-----|-----|------|
| BBA28 |      | hypothetical protein                              | 1.52 | 0.18 | 0.014 | Hypothetical proteins                          |                                               | N |     | 167 |      |
| BBA39 |      | hypothetical protein                              | 0.58 | 0.06 | 0.003 | Hypothetical proteins                          |                                               | N | 147 | 23  |      |
| BBA41 |      | Conserved hypothetical protein                    | 0.69 | 0.05 | 0.003 | Hypothetical proteins - Conserved<br>Conserved |                                               | Y | 149 | 90  |      |
| BBA43 |      | Conserved hypothetical protein                    | 0.67 | 0.03 | 2E-04 | Hypothetical proteins - Conserved<br>Conserved |                                               | N | 107 | 81  |      |
| BBA55 |      | hypothetical protein                              | 0.76 | 0.03 | 8E-06 | Hypothetical proteins                          |                                               | N | 159 | 121 |      |
| BBA56 |      | hypothetical protein                              | 0.63 | 0.03 | 5E-05 | Hypothetical proteins                          |                                               | Y | 160 | 53  |      |
| BBA57 |      | hypothetical protein                              | 0.63 | 0.03 | 6E-07 | Hypothetical proteins                          |                                               | N |     | 51  |      |
| BBA68 |      | hypothetical protein                              | 1.42 | 0.14 | 0.01  | Hypothetical proteins                          |                                               | N | 54  | 136 |      |
| BBB01 |      | Conserved hypothetical protein                    | 1.45 | 0.15 | 0.015 | Hypothetical proteins - Conserved<br>Conserved |                                               | N |     | 149 |      |
| BBB05 | celC | PTS system, cellobiose-specific<br>IIA component  | 0.64 | 0.08 | 0.01  | Transport and binding<br>proteins              | Carbohydrates, organic<br>alcohols, and acids | Y |     | 59  |      |
| BBB06 | celA | PTS system, cellobiose-specific<br>IIB component  | 0.50 | 0.05 | 8E-04 | Transport and binding<br>proteins              | Carbohydrates, organic<br>alcohols, and acids | Y |     | 5   | 0.62 |
| BBB07 |      | Outer surface protein, putative                   | 0.57 | 0.05 | 0.001 | Cell envelope                                  | Other                                         | N |     | 19  |      |
| BBB08 |      | hypothetical protein                              | 0.61 | 0.05 | 9E-04 | Hypothetical proteins                          |                                               | N |     | 36  |      |
| BBB09 |      | hypothetical protein                              | 0.63 | 0.04 | 7E-05 | Hypothetical proteins                          |                                               | N |     | 54  |      |
| BBB10 |      | Conserved hypothetical protein                    | 0.62 | 0.11 | 0.031 | Hypothetical proteins - Conserved<br>Conserved |                                               | N | 62  | 41  |      |
| BBB14 |      | hypothetical protein                              | 0.63 | 0.04 | 2E-04 | Hypothetical proteins - Conserved<br>Conserved |                                               | N |     | 46  |      |
| BBD14 |      | Conserved hypothetical protein                    | 0.63 | 0.05 | 0.001 | Hypothetical proteins - Conserved<br>Conserved |                                               | N | 62  | 47  |      |
| BBF18 |      | Transposase-like protein,<br>authentic frameshift | 0.64 | 0.12 | 0.047 | Other categories                               | Transposon functions                          | N | 82  | 56  |      |
| BBF19 |      | Transposase-like protein,<br>authentic frameshift | 1.40 | 0.10 | 0.004 | Other categories                               | Transposon functions                          | N | 82  | 130 |      |
| BBF20 |      | Conserved hypothetical protein                    | 1.58 | 0.08 | 2E-04 | Hypothetical proteins - Conserved<br>Conserved |                                               | N | 85  | 185 |      |
| BBF23 |      | Conserved hypothetical protein                    | 0.63 | 0.03 | 3E-07 | Hypothetical proteins - Conserved<br>Conserved |                                               | N | 49  | 49  |      |



|         |                                            |      |      |       |                                                |                                                                                 |   |     |     |      |
|---------|--------------------------------------------|------|------|-------|------------------------------------------------|---------------------------------------------------------------------------------|---|-----|-----|------|
| BBF25   | Conserved hypothetical protein             | 1.53 | 0.07 | 1E-04 | Hypothetical proteins - Conserved<br>Conserved |                                                                                 | N | 50  | 169 |      |
| BBF27   | hypothetical protein                       | 1.63 | 0.14 | 1E-03 | Hypothetical proteins                          |                                                                                 | N | 101 | 197 |      |
| BBF33   | vlsE Vmp-like sequence protein             | 0.59 | 0.04 | 1E-05 | Cell envelope                                  | Other                                                                           | N |     | 27  | 0.88 |
| BBG09   | Conserved hypothetical protein             | 2.01 | 0.31 | 0.004 | Hypothetical proteins - Conserved<br>Conserved |                                                                                 | N | 49  | 245 |      |
| BBH18.1 | Conserved hypothetical protein, pseudogene | 0.43 | 0.08 | 0.037 | Hypothetical proteins - Conserved<br>Conserved |                                                                                 | N | 65  | 1   |      |
| BBH25   | hypothetical protein                       | 1.67 | 0.28 | 0.025 | Hypothetical proteins                          | +                                                                               | N |     | 204 |      |
| BBH28   | Plasmid partition protein, putative        | 1.51 | 0.20 | 0.025 | Cellular processes                             | Cell division                                                                   | N | 32  | 164 |      |
| BBH29   | Conserved hypothetical protein             | 1.45 | 0.14 | 0.008 | Hypothetical proteins - Conserved<br>Conserved |                                                                                 | N | 49  | 145 |      |
| BBI02.2 | Brute Force ORF                            | 2.21 | 0.49 | 0.061 | Hypothetical proteins                          |                                                                                 | N | 73  | 252 |      |
| BBI42   | Outer membrane protein, putative           | 0.71 | 0.07 | 0.009 | Cell envelope                                  | Other                                                                           | Y | 52  | 107 |      |
| BBJ23   | hypothetical protein                       | 0.66 | 0.04 | 6E-04 | Hypothetical proteins                          |                                                                                 | N | 106 | 70  |      |
| BBJ34   | hypothetical protein                       | 1.68 | 0.18 | 0.001 | Hypothetical proteins                          |                                                                                 | N | 92  | 207 |      |
| BBK04   | hypothetical protein                       | 0.61 | 0.12 | 0.042 | Hypothetical proteins                          |                                                                                 | N | 1   | 37  |      |
| BBK06   | hypothetical protein                       | 1.37 | 0.05 | 2E-06 | Hypothetical proteins                          |                                                                                 | N |     | 126 |      |
| BBK07   | hypothetical protein                       | 1.34 | 0.07 | 0.002 | Hypothetical proteins                          |                                                                                 | Y | 59  | 123 |      |
| BBK15   | Antigen, P35, putative                     | 1.81 | 0.16 | 4E-04 | Cell envelope                                  | Biosynthesis and degradation of surface polysaccharides and lipopolysaccharides | N | 60  | 225 |      |
| BBK18   | Conserved hypothetical protein             | 1.58 | 0.22 | 0.017 | Hypothetical proteins - Conserved<br>Conserved |                                                                                 | N |     | 188 |      |
| BBK21   | Plasmid partition protein, putative        | 1.82 | 0.09 | 9E-07 | Cellular processes                             | Cell division                                                                   | Y | 32  | 229 |      |
| BBK24.1 | hypothetical protein                       | 1.63 | 0.17 | 0.029 | Hypothetical proteins                          | +                                                                               | Y |     | 198 |      |
| BBK26   | hypothetical protein                       | 0.72 | 0.06 | 0.01  | Hypothetical proteins                          |                                                                                 | N | 1   | 110 |      |

|         |                                            |      |      |       |                                                |                                 |   |   |     |     |
|---------|--------------------------------------------|------|------|-------|------------------------------------------------|---------------------------------|---|---|-----|-----|
| BBK52.1 | Conserved hypothetical protein, pseudogene | 0.70 | 0.03 | 0.008 | Hypothetical proteins - Conserved<br>Conserved |                                 | + | N | 174 | 105 |
| BBL09   | Conserved hypothetical protein             | 0.54 | 0.02 | 2E-09 | Hypothetical proteins - Conserved<br>Conserved |                                 | + | N | 108 | 12  |
| BBL15   | hypothetical protein                       | 0.63 | 0.06 | 0.003 | Hypothetical proteins                          |                                 | + | Y | 156 | 50  |
| BBL19   | Conserved hypothetical protein             | 0.56 | 0.04 | 2E-04 | Hypothetical proteins - Conserved<br>Conserved |                                 | + | N | 139 | 16  |
| BBL28   | Lipoprotein                                | 0.72 | 0.04 | 5E-04 | Cell envelope                                  | Other                           |   | Y | 113 | 112 |
| BBL29   | Conserved hypothetical protein             | 1.35 | 0.08 | 5E-04 | Hypothetical proteins - Conserved<br>Conserved |                                 | + | N | 161 | 124 |
| BBL33   | hypothetical protein                       | 1.64 | 0.11 | 5E-04 | Hypothetical proteins                          |                                 |   | N |     | 201 |
| BBL34   | Conserved hypothetical protein             | 1.74 | 0.19 | 0.002 | Hypothetical proteins - Conserved<br>Conserved |                                 |   | N | 49  | 219 |
| BBL35   | Conserved hypothetical protein             | 1.57 | 0.05 | 4E-08 | Hypothetical proteins - Conserved<br>Conserved |                                 |   | Y | 80  | 183 |
| BBM02   | hypothetical protein                       | 0.60 | 0.08 | 0.011 | Hypothetical proteins                          |                                 | + | N | 147 | 32  |
| BBM03   | hypothetical protein                       | 0.63 | 0.05 | 0.002 | Hypothetical proteins                          |                                 | + | N | 148 | 52  |
| BBM15   | hypothetical protein                       | 1.55 | 0.05 | 1E-07 | Hypothetical proteins                          |                                 |   | Y | 156 | 177 |
| BBM20   | Conserved hypothetical protein             | 0.46 | 0.02 | 1E-08 | Hypothetical proteins - Conserved<br>Conserved |                                 |   | Y | 140 | 2   |
| BBM22   | Conserved hypothetical protein             | 0.66 | 0.04 | 1E-04 | Hypothetical proteins - Conserved<br>Conserved |                                 |   | Y | 142 | 74  |
| BBM24   | blyB Hemolysin accessory protein           | 0.58 | 0.05 | 4E-04 | Cellular processes                             | Toxin production and resistance |   | N | 111 | 21  |
| BBM25   | Conserved hypothetical protein             | 0.68 | 0.04 | 4E-04 | Hypothetical proteins - Conserved<br>Conserved |                                 | + | N | 112 | 85  |
| BBM26   | Conserved hypothetical protein             | 0.71 | 0.02 | 5E-06 | Hypothetical proteins - Conserved<br>Conserved |                                 | + | Y | 143 | 106 |
| BBM37   | Conserved hypothetical protein             | 1.44 | 0.05 | 1E-05 | Hypothetical proteins - Conserved<br>Conserved |                                 | + | Y | 96  | 144 |
| BBN19   | Conserved hypothetical protein             | 0.55 | 0.04 | 1E-04 | Hypothetical proteins - Conserved<br>Conserved |                                 | + | Y | 139 | 15  |
| BBN20   | Conserved hypothetical protein             | 0.49 | 0.03 | 1E-06 | Hypothetical proteins - Conserved<br>Conserved |                                 | + | Y | 140 | 4   |
| BBN21   | Hypothetical protein, authentic frameshift | 0.56 | 0.03 | 8E-06 | Hypothetical proteins - Conserved<br>Conserved |                                 |   | N | 141 | 18  |
| BBN23   | blyA Pore-forming hemolysin                | 0.67 | 0.06 | 0.004 | Cellular processes                             | Toxin production and resistance |   | Y | 109 | 77  |

|       |      |                                     |      |      |       |                                   |                                 |   |   |     |     |
|-------|------|-------------------------------------|------|------|-------|-----------------------------------|---------------------------------|---|---|-----|-----|
| BBN24 | blyB | Hemolysin accessory protein         | 0.67 | 0.04 | 2E-04 | Cellular processes                | Toxin production and resistance | + | N | 111 | 78  |
| BBN25 |      | Conserved hypothetical protein      | 0.65 | 0.04 | 6E-04 | Hypothetical proteins - Conserved | Conserved                       |   | N | 112 | 65  |
| BBN32 |      | Plasmid partition protein, putative | 1.94 | 0.11 | 1E-07 | Cellular processes                | Cell division                   |   | Y | 32  | 238 |
| BBN33 |      | Conserved hypothetical protein      | 1.59 | 0.12 | 0.001 | Hypothetical proteins - Conserved | Conserved                       |   | N | 49  | 189 |
| BBO01 |      | hypothetical protein                | 0.69 | 0.05 | 0.002 | Hypothetical proteins             |                                 |   | Y | 146 | 93  |
| BBO02 |      | hypothetical protein                | 0.59 | 0.06 | 0.002 | Hypothetical proteins             |                                 |   | N | 147 | 25  |
| BBO03 |      | hypothetical protein                | 0.67 | 0.08 | 0.013 | Hypothetical proteins             |                                 | + | N | 148 | 82  |
| BBO04 |      | hypothetical protein                | 0.61 | 0.03 | 1E-05 | Hypothetical proteins             |                                 | + | Y | 148 | 38  |
| BBO05 |      | hypothetical protein                | 0.68 | 0.09 | 0.031 | Hypothetical proteins             |                                 | + | Y | 148 | 87  |
| BBO06 |      | Conserved hypothetical protein      | 0.69 | 0.06 | 0.004 | Hypothetical proteins - Conserved | Conserved                       |   | N | 149 | 92  |
| BBO08 |      | Conserved hypothetical protein      | 0.60 | 0.03 | 1E-04 | Hypothetical proteins - Conserved | Conserved                       | + | N | 107 | 30  |
| BBO36 |      | Conserved hypothetical protein      | 0.58 | 0.02 | 6E-08 | Hypothetical proteins - Conserved | Conserved                       |   | N | 165 | 22  |
| BBO37 |      | Conserved hypothetical protein      | 0.54 | 0.06 | 0.002 | Hypothetical proteins - Conserved | Conserved                       | + | Y | 144 | 11  |
| BBO42 |      | hypothetical protein                | 0.69 | 0.08 | 0.025 | Hypothetical proteins             |                                 |   | N | 114 | 97  |
| BBO43 |      | hypothetical protein                | 0.65 | 0.03 | 7E-05 | Hypothetical proteins             |                                 |   | N | 115 | 62  |
| BBO44 |      | Conserved hypothetical protein      | 0.66 | 0.04 | 2E-04 | Hypothetical proteins - Conserved | Conserved                       |   | N | 145 | 71  |
| BBP02 |      | hypothetical protein                | 0.69 | 0.06 | 0.006 | Hypothetical proteins             |                                 | + | N | 147 | 91  |
| BBP06 |      | Conserved hypothetical protein      | 0.68 | 0.03 | 4E-05 | Hypothetical proteins - Conserved | Conserved                       | + | N | 149 | 88  |
| BBP09 |      | Conserved hypothetical protein      | 0.65 | 0.03 | 4E-05 | Hypothetical proteins - Conserved | Conserved                       | + | N | 108 | 66  |
| BBP10 |      | Conserved hypothetical protein      | 0.63 | 0.05 | 0.001 | Hypothetical proteins - Conserved | Conserved                       | + | Y | 151 | 48  |
| BBP11 |      | hypothetical protein                | 0.64 | 0.04 | 7E-04 | Hypothetical proteins             |                                 | + | N | 152 | 57  |

|       |      |                                               |      |      |       |                                                |                                    |   |   |     |     |
|-------|------|-----------------------------------------------|------|------|-------|------------------------------------------------|------------------------------------|---|---|-----|-----|
| BBP19 |      | Conserved hypothetical protein                | 0.65 | 0.05 | 0.001 | Hypothetical proteins - Conserved<br>Conserved |                                    | + | N | 139 | 63  |
| BBP20 |      | Conserved hypothetical protein                | 0.64 | 0.03 | 2E-04 | Hypothetical proteins - Conserved<br>Conserved |                                    | + | Y | 140 | 58  |
| BBP21 |      | Conserved hypothetical protein                | 0.66 | 0.06 | 0.007 | Hypothetical proteins - Conserved<br>Conserved |                                    | + | N | 141 | 69  |
| BBP23 | blyA | Pore-forming hemolysin                        | 0.59 | 0.04 | 5E-04 | Cellular processes                             | Toxin production and<br>resistance | + | N | 109 | 29  |
| BBP24 | blyB | Hemolysin accessory protein                   | 0.59 | 0.04 | 2E-04 | Cellular processes                             | Toxin production and<br>resistance | + | N | 111 | 28  |
| BBP42 |      | Conserved hypothetical protein                | 0.65 | 0.04 | 9E-05 | Hypothetical proteins - Conserved<br>Conserved |                                    |   | N | 145 | 68  |
| BBQ02 |      | hypothetical protein                          | 0.60 | 0.05 | 5E-04 | Hypothetical proteins                          |                                    | + | N | 174 | 34  |
| BBQ12 |      | hypothetical protein                          | 0.69 | 0.06 | 0.005 | Hypothetical proteins                          |                                    |   | Y | 148 | 98  |
| BBQ13 |      | Conserved hypothetical protein                | 0.64 | 0.04 | 3E-04 | Hypothetical proteins - Conserved<br>Conserved |                                    | + | N | 149 | 60  |
| BBQ14 |      | Conserved hypothetical protein                | 0.54 | 0.08 | 0.006 | Hypothetical proteins - Conserved<br>Conserved |                                    |   | N | 150 | 13  |
| BBQ28 |      | Conserved hypothetical protein                | 0.58 | 0.11 | 0.025 | Hypothetical proteins - Conserved<br>Conserved |                                    |   | N | 141 | 20  |
| BBQ29 |      | Conserved hypothetical protein                | 0.60 | 0.05 | 6E-04 | Hypothetical proteins - Conserved<br>Conserved |                                    |   | Y | 142 | 33  |
| BBQ30 | blyA | Pore-forming hemolysin                        | 0.51 | 0.05 | 0.001 | Cellular processes                             | Toxin production and<br>resistance | + | N | 109 | 8   |
| BBQ32 |      | Conserved hypothetical protein                | 0.59 | 0.05 | 8E-04 | Hypothetical proteins - Conserved<br>Conserved |                                    | + | N | 112 | 26  |
| BBQ36 |      | hypothetical protein                          | 1.51 | 0.13 | 0.002 | Hypothetical proteins                          |                                    |   | Y |     | 161 |
| BBQ51 |      | Hypothetical protein, authentic<br>frameshift | 0.66 | 0.07 | 0.006 | Hypothetical proteins                          |                                    |   | Y | 146 | 72  |
| BBQ75 |      | Conserved hypothetical protein,<br>pseudogene | 0.74 | 0.05 | 0.004 | Hypothetical proteins - Conserved<br>Conserved |                                    |   | N | 168 | 118 |
| BBR05 |      | hypothetical protein                          | 0.65 | 0.09 | 0.019 | Hypothetical proteins                          |                                    |   | Y | 148 | 67  |
| BBR07 |      | Conserved hypothetical protein                | 0.68 | 0.05 | 0.003 | Hypothetical proteins - Conserved<br>Conserved |                                    |   | N | 150 | 86  |
| BBR09 |      | Conserved hypothetical protein                | 0.69 | 0.07 | 0.011 | Hypothetical proteins - Conserved<br>Conserved |                                    | + | N | 108 | 94  |
| BBR11 |      | hypothetical protein                          | 0.70 | 0.05 | 0.001 | Hypothetical proteins                          |                                    |   | N | 152 | 101 |

|       |      |                                        |      |      |       |                                                |                                    |   |   |     |     |      |
|-------|------|----------------------------------------|------|------|-------|------------------------------------------------|------------------------------------|---|---|-----|-----|------|
| BBR19 |      | Conserved hypothetical protein         | 0.70 | 0.06 | 0.005 | Hypothetical proteins - Conserved<br>Conserved |                                    | + | Y | 139 | 102 |      |
| BBR20 |      | Conserved hypothetical protein         | 0.68 | 0.02 | 2E-07 | Hypothetical proteins - Conserved<br>Conserved |                                    |   | Y | 140 | 83  |      |
| BBR21 |      | Conserved hypothetical protein         | 0.60 | 0.06 | 0.003 | Hypothetical proteins - Conserved<br>Conserved |                                    |   | N | 141 | 35  |      |
| BBR23 | blyA | Pore-forming hemolysin                 | 0.51 | 0.03 | 1E-07 | Cellular processes                             | Toxin production and<br>resistance | + | N | 109 | 7   |      |
| BBR24 | blyB | Hemolysin accessory protein            | 0.66 | 0.07 | 0.007 | Cellular processes                             | Toxin production and<br>resistance | + | N | 111 | 73  |      |
| BBR25 |      | Conserved hypothetical protein         | 0.74 | 0.03 | 5E-05 | Hypothetical proteins - Conserved<br>Conserved |                                    | + | N | 112 | 115 |      |
| BBR29 |      | Conserved hypothetical protein         | 0.70 | 0.02 | 4E-05 | Hypothetical proteins - Conserved<br>Conserved |                                    |   | N | 161 | 104 |      |
| BBR33 |      | Plasmid partition protein,<br>putative | 1.55 | 0.17 | 0.008 | Cellular processes                             | Cell division                      |   | Y | 32  | 178 |      |
| BBR34 |      | Conserved hypothetical protein         | 1.81 | 0.21 | 0.003 | Hypothetical proteins - Conserved<br>Conserved |                                    |   | N | 49  | 227 |      |
| BBS01 |      | hypothetical protein                   | 0.60 | 0.08 | 0.009 | Hypothetical proteins                          |                                    |   | N | 146 | 31  |      |
| BBS04 |      | hypothetical protein                   | 0.68 | 0.08 | 0.022 | Hypothetical proteins                          |                                    | + | Y | 148 | 84  |      |
| BBS05 |      | hypothetical protein                   | 0.65 | 0.09 | 0.019 | Hypothetical proteins                          |                                    | + | Y | 148 | 61  |      |
| BBS06 |      | Conserved hypothetical protein         | 0.62 | 0.06 | 0.002 | Hypothetical proteins - Conserved<br>Conserved |                                    | + | N | 149 | 40  |      |
| BBS09 |      | Conserved hypothetical protein         | 0.74 | 0.05 | 0.003 | Hypothetical proteins - Conserved<br>Conserved |                                    | + | N | 108 | 114 |      |
| BBS18 |      | hypothetical protein                   | 1.40 | 0.08 | 0.001 | Hypothetical proteins                          |                                    | + | N | 160 | 131 |      |
| BBS41 | ospG | Outer surface protein G                | 0.52 | 0.05 | 4E-04 | Cell envelope                                  | Other                              |   | Y | 164 | 9   | 0.42 |
| BBU05 |      | Plasmid partition protein,<br>putative | 2.24 | 0.16 | 1E-05 | Cellular processes                             | Cell division                      |   | N | 32  | 253 |      |
| BBU06 |      | Conserved hypothetical protein         | 1.74 | 0.27 | 0.014 | Hypothetical proteins - Conserved<br>Conserved |                                    |   | Y | 49  | 218 |      |

\*Standard Error.

† *t*-test *P*-value indicating significant difference from ratio of 1.0.

‡ Probe for this ORF has  $\geq 80\%$  identity to another probe on the array.

§ Putative  $\sigma^{54}$ -dependent promoter upstream of this ORF. Y, putative promoter is present. N, no promoter found.

¶ Rank order, from lowest to highest, of mutant/WT ratio.

|| Taqman ratio of *ntrA* mutant/WT.
