# Supplementary material
Source: PubMed Central journal article supplement (PMC555983)
Supplement: pnas_102_14_5162__5.pdf [file pnas_102_14_5162__5.pdf]

**Table 5. Genes with significantly altered expression only in the *rpoS* mutant relative to WT (regulatory group 2).**

| ORF    | Name   | Description                           | Ratio,<br><i>rpoS</i> /WT | SE*  | <i>P</i> <sup>†</sup> | Main role                                    | Subrole                                           | Potential<br>to cross-<br>hybridize <sup>‡</sup> | Paralog.<br>family<br>no. | Rank <sup>§</sup> | Taqman<br>ratio <sup>¶</sup> |
|--------|--------|---------------------------------------|---------------------------|------|-----------------------|----------------------------------------------|---------------------------------------------------|--------------------------------------------------|---------------------------|-------------------|------------------------------|
| BB0039 |        | Hypothetical protein                  | 1.79                      | 0.28 | 0.005                 | Hypothetical proteins                        |                                                   |                                                  |                           | 89                |                              |
| BB0066 |        | Hypothetical protein                  | 0.73                      | 0.06 | 0.005                 | Hypothetical proteins                        |                                                   |                                                  |                           | 33                |                              |
| BB0070 |        | Conserved hypothetical protein        | 0.68                      | 0.05 | 8E-04                 | Hypothetical proteins -<br>Conserved         | Conserved                                         |                                                  |                           | 11                |                              |
| BB0071 |        | Hypothetical protein                  | 0.70                      | 0.08 | 0.024                 | Hypothetical proteins                        |                                                   |                                                  |                           | 25                |                              |
| BB0090 |        | V-type ATPase, subunit K,<br>putative | 0.69                      | 0.07 | 0.007                 | Energy metabolism                            | ATP-proton motive force<br>interconversion        |                                                  |                           | 15                |                              |
| BB0103 |        | Hypothetical protein                  | 0.79                      | 0.03 | 0.001                 | Hypothetical proteins                        |                                                   |                                                  |                           | 50                |                              |
| BB0106 |        | Hypothetical protein                  | 1.45                      | 0.15 | 0.005                 | Hypothetical proteins                        |                                                   |                                                  |                           | 67                |                              |
| BB0132 | greA   | Transcription elongation factor       | 0.80                      | 0.02 | 1E-04                 | Transcription                                | Transcription factors                             |                                                  |                           | 52                |                              |
| BB0183 |        | Conserved hypothetical protein        | 0.77                      | 0.04 | 0.003                 | Hypothetical proteins -<br>Conserved         | Conserved                                         |                                                  |                           | 46                |                              |
| BB0214 | efp    | Translation elongation factor P       | 1.48                      | 0.12 | 0.003                 | Protein synthesis                            | Translation factors                               |                                                  |                           | 68                |                              |
| BB0222 | pgl    | 6-phosphogluconolactonase             | 0.71                      | 0.02 | 2E-05                 | Energy metabolism                            | Pentose phosphate<br>pathway                      |                                                  |                           | 26                |                              |
| BB0229 | rpmE   | Ribosomal protein L31                 | 1.64                      | 0.19 | 0.003                 | Protein synthesis                            | Ribosomal proteins:<br>synthesis and modification |                                                  |                           | 82                |                              |
| BB0249 |        | Phosphatidyltransferase               | 0.75                      | 0.05 | 0.002                 | Fatty acid and<br>phospholipid<br>metabolism | Biosynthesis                                      |                                                  |                           | 36                |                              |
| BB0250 | dedA   | DedA protein                          | 0.75                      | 0.05 | 0.003                 | Unknown function                             | General                                           |                                                  |                           | 38                |                              |
| BB0256 | rpsU   | Ribosomal protein S21                 | 1.67                      | 0.25 | 0.013                 | Protein synthesis                            | Ribosomal proteins:<br>synthesis and modification |                                                  |                           | 86                |                              |
| BB0273 | fliR   | Flagellar biosynthesis protein        | 0.73                      | 0.03 | 1E-04                 | Cellular processes                           | Chemotaxis and motility                           |                                                  |                           | 31                |                              |
| BB0274 | fliQ   | Flagellar biosynthesis protein        | 0.78                      | 0.03 | 6E-04                 | Cellular processes                           | Chemotaxis and motility                           |                                                  |                           | 48                |                              |
| BB0277 | fliN   | Flagellar motor switch protein        | 0.62                      | 0.06 | 7E-04                 | Cellular processes                           | Chemotaxis and motility                           |                                                  |                           | 4                 |                              |
| BB0280 | motB   | Flagellar motor rotation protein B    | 1.41                      | 0.11 | 0.002                 | Cellular processes                           | Chemotaxis and motility                           |                                                  |                           | 63                |                              |
| BB0319 | tpn38b | Exported protein                      | 0.76                      | 0.05 | 0.004                 | Cell envelope                                | Other                                             |                                                  |                           | 43                |                              |
| BB0336 |        | P26                                   | 1.49                      | 0.12 | 0.004                 | Unknown function                             | General                                           |                                                  |                           | 70                |                              |
| BB0340 |        | Hypothetical protein                  | 1.35                      | 0.07 | 1E-04                 | Hypothetical proteins                        |                                                   |                                                  |                           | 59                |                              |
| BB0376 | metK   | S-adenosylmethionine<br>synthetase    | 0.70                      | 0.07 | 0.009                 | Central intermediary<br>metabolism           | Other                                             |                                                  |                           | 20                |                              |
| BB0418 |        | Hypothetical protein                  | 0.67                      | 0.06 | 0.004                 | Hypothetical proteins                        |                                                   |                                                  |                           | 9                 |                              |

|        |        |                                                                                          |      |      |       |                                                            |                                                   |     |  |    |      |
|--------|--------|------------------------------------------------------------------------------------------|------|------|-------|------------------------------------------------------------|---------------------------------------------------|-----|--|----|------|
| BB0454 |        | Lipopolysaccharide biosynthesis-related protein                                          | 0.74 | 0.04 | 3E-04 | Unknown function                                           | General                                           |     |  | 35 |      |
| BB0518 | dnaK-2 | Heat shock protein 70                                                                    | 1.40 | 0.15 | 0.021 | Protein fate                                               | Protein folding and stabilization                 | 9   |  | 62 |      |
| BB0525 |        | Conserved hypothetical protein                                                           | 1.36 | 0.08 | 9E-04 | Hypothetical proteins - Conserved                          | Conserved                                         |     |  | 60 |      |
| BB0565 | cheW-2 | Purine-binding chemotaxis protein                                                        | 0.77 | 0.05 | 0.003 | Cellular processes                                         | Chemotaxis and motility                           | 33  |  | 45 |      |
| BB0567 | cheA-1 | Chemotaxis histidine kinase                                                              | 0.79 | 0.03 | 2E-04 | Cellular processes                                         | Chemotaxis and motility                           | 134 |  | 49 |      |
| BB0575 | pyrG   | CTP synthase                                                                             | 0.73 | 0.05 | 8E-04 | Purines, pyrimidines, nucleosides, and nucleotides         | Pyrimidine ribonucleotide biosynthesis            |     |  | 34 |      |
| BB0581 | recG   | DNA recombinase                                                                          | 0.75 | 0.06 | 0.01  | DNA metabolism                                             | DNA replication, recombination, and repair        | 20  |  | 37 |      |
| BB0586 | femA   | FemA protein                                                                             | 0.80 | 0.04 | 0.006 | Cell envelope                                              | Biosynthesis of murein sacculus and peptidoglycan |     |  | 51 |      |
| BB0587 | metG   | Methionyl-tRNA synthetase                                                                | 0.70 | 0.04 | 1E-04 | Protein synthesis                                          | tRNA aminoacylation                               | 126 |  | 23 |      |
| BB0606 |        | Conserved hypothetical protein                                                           | 0.77 | 0.06 | 0.012 | Hypothetical proteins - Conserved                          | Conserved                                         |     |  | 44 |      |
| BB0614 |        | Hypothetical protein                                                                     | 0.78 | 0.04 | 4E-04 | Hypothetical proteins                                      |                                                   |     |  | 47 |      |
| BB0618 | cdd    | Cytidine deaminase                                                                       | 1.77 | 0.14 | 3E-05 | Purines, pyrimidines, nucleosides, and nucleotides         | Salvage of nucleosides and nucleotides            |     |  | 88 | 1.24 |
| BB0619 |        | Conserved hypothetical protein                                                           | 1.28 | 0.08 | 0.004 | Hypothetical proteins - Conserved                          | Conserved                                         |     |  | 57 |      |
| BB0621 | thiJ   | 4-methyl-5(b-hydroxyethyl)-thiazole monophosphate biosynthesis protein                   | 2.49 | 0.30 | 2E-04 | Biosynthesis of cofactors, prosthetic groups, and carriers | Thiamine                                          |     |  | 93 | 1.21 |
| BB0628 |        | Conserved hypothetical protein                                                           | 1.67 | 0.13 | 8E-04 | Hypothetical proteins - Conserved                          | Conserved                                         |     |  | 85 | 1.14 |
| BB0638 | nhaC-2 | Na <sup>+</sup> /H <sup>+</sup> antiporter                                               | 0.72 | 0.07 | 0.011 | Transport and binding proteins                             | Cations                                           | 135 |  | 28 |      |
| BB0639 | potD   | Spermidine/putrescine ABC transporter, spermidine/putrescine-binding periplasmic protein | 0.68 | 0.06 | 0.002 | Transport and binding proteins                             | Amino acids, peptides and amines                  |     |  | 12 |      |
| BB0648 |        | Serine/threonine kinase, putative                                                        | 0.70 | 0.07 | 0.016 | Protein fate                                               | Protein modification and repair                   |     |  | 21 |      |
| BB0663 |        | Hypothetical protein                                                                     | 0.73 | 0.05 | 0.004 | Hypothetical proteins                                      |                                                   |     |  | 32 |      |
| BB0676 | gph    | Phosphoglycolate phosphatase                                                             | 1.68 | 0.17 | 0.003 | Energy metabolism                                          | Sugars                                            |     |  | 87 |      |

|         |       |                                                              |      |      |       |                                                    |                                                   |     |     |      |
|---------|-------|--------------------------------------------------------------|------|------|-------|----------------------------------------------------|---------------------------------------------------|-----|-----|------|
| BB0680  | mcp-4 | Methyl-accepting chemotaxis protein                          | 0.55 | 0.06 | 6E-04 | Cellular processes                                 | Chemotaxis and motility                           | 13  | 1   |      |
| BB0696  |       | Conserved hypothetical protein                               | 0.72 | 0.08 | 0.021 | Hypothetical proteins - Conserved                  | Conserved                                         |     | 29  |      |
| BB0728  | nox   | NADH oxidase, water-forming                                  | 0.71 | 0.08 | 0.018 | Energy metabolism                                  | Aerobic                                           |     | 27  | 0.87 |
| BB0732  | pbp-3 | Penicillin-binding protein                                   | 0.75 | 0.06 | 0.006 | Cell envelope                                      | Biosynthesis of murein sacculus and peptidoglycan |     | 39  |      |
| BB0754  |       | ABC transporter, ATP-binding protein                         | 0.69 | 0.06 | 0.004 | Transport and binding proteins                     | Unknown substrate                                 | 4   | 19  |      |
| BB0758  |       | Lipoprotein, putative                                        | 0.76 | 0.04 | 8E-04 | Cell envelope                                      | Other                                             |     | 41  |      |
| BB0791  | tdk   | Thymidine kinase                                             | 0.67 | 0.04 | 2E-05 | Purines, pyrimidines, nucleosides, and nucleotides | Salvage of nucleosides and nucleotides            |     | 10  |      |
| BB0810  |       | Virulence factor mviN protein (mviN)                         | 0.68 | 0.06 | 0.005 | Cellular processes                                 | Pathogenesis                                      |     | 13  |      |
| BB0815  |       | Conserved hypothetical protein                               | 0.69 | 0.03 | 2E-04 | Hypothetical proteins - Conserved                  | Conserved                                         | 45  | 17  |      |
| BB0840  |       | Lipoprotein, putative                                        | 0.61 | 0.04 | 6E-04 | Cell envelope                                      | Other                                             |     | 2   | 0.98 |
| BBA12   |       | Conserved hypothetical protein                               | 1.65 | 0.29 | 0.025 | Hypothetical proteins - Conserved                  | Conserved                                         |     | 84  |      |
| BBA22   |       | Hypothetical protein                                         | 1.50 | 0.19 | 0.018 | Hypothetical proteins                              |                                                   |     | 71  |      |
| BBA23   |       | Conserved hypothetical protein                               | 1.56 | 0.17 | 0.004 | Hypothetical proteins - Conserved                  | Conserved                                         | 144 | 77  |      |
| BBA24   | dbpA  | Decorin binding protein A                                    | 0.62 | 0.06 | 0.003 | Cell envelope                                      | Other                                             | 74  | 3   |      |
| BBB03   |       | Hypothetical protein                                         | 0.67 | 0.07 | 0.013 | Hypothetical proteins                              |                                                   |     | 7   |      |
| BBB13   |       | Conserved hypothetical protein                               | 0.70 | 0.06 | 0.006 | Hypothetical proteins - Conserved                  | Conserved                                         | 49  | 22  |      |
| BBD06   |       | Conserved hypothetical protein                               | 0.72 | 0.06 | 0.005 | Hypothetical proteins - Conserved                  | Conserved                                         | 73  | 30  |      |
| BBD13   |       | Hypothetical protein                                         | 0.66 | 0.05 | 1E-03 | Hypothetical proteins - Conserved                  | Conserved                                         |     | 6   |      |
| BBE22   | pncA  | Pyrazinamidase/nicotinamidase                                | 2.17 | 0.19 | 4E-05 | Cellular processes                                 | Toxin production and resistance                   |     | 92  | 1.19 |
| BBE23.2 |       | Hypothetical protein, authentic point mutation               | 1.98 | 0.27 | 0.006 | Hypothetical proteins - Conserved                  | Conserved                                         | 32  | 91  |      |
| BBF32   |       | Vls recombination cassettes Vls2-Vls16, authentic frameshift | 1.90 | 0.22 | 0.002 | Cell envelope                                      | Other                                             | 170 | 90  |      |
| BBG06   |       | Conserved hypothetical protein                               | 1.58 | 0.10 | 2E-05 | Hypothetical proteins - Conserved                  | Conserved                                         | 73  | 79  |      |
| BBG19   |       | Hypothetical protein                                         | 0.85 | 0.02 | 4E-05 | Hypothetical proteins                              |                                                   | +   | 117 | 55   |
| BBI11   |       | Hypothetical protein                                         | 1.63 | 0.18 | 0.004 | Hypothetical proteins                              |                                                   |     | 80  |      |

|       |       |                                     |      |      |       |                                   |                                                                                 |    |     |    |
|-------|-------|-------------------------------------|------|------|-------|-----------------------------------|---------------------------------------------------------------------------------|----|-----|----|
| BBI12 |       | Hypothetical protein                | 1.51 | 0.14 | 0.006 | Hypothetical proteins             |                                                                                 |    | 73  |    |
| BBI18 |       | Hypothetical protein                | 1.58 | 0.18 | 0.003 | Hypothetical proteins             |                                                                                 |    | 78  |    |
| BBI19 |       | Conserved hypothetical protein      | 2.64 | 0.24 | 6E-05 | Hypothetical proteins - Conserved | Conserved                                                                       | 73 | 94  |    |
| BBI21 |       | Plasmid partition protein, putative | 1.28 | 0.06 | 4E-04 | Cellular processes                | Cell division                                                                   | 32 | 56  |    |
| BBI36 |       | Antigen, P35, putative              | 1.50 | 0.16 | 0.011 | Cell envelope                     | Biosynthesis and degradation of surface polysaccharides and lipopolysaccharides | +  | 54  | 72 |
| BBI41 |       | Hypothetical protein                | 1.52 | 0.14 | 0.003 | Hypothetical proteins             |                                                                                 | 82 | 74  |    |
| BBJ25 |       | Hypothetical protein                | 0.80 | 0.03 | 3E-04 | Hypothetical proteins             |                                                                                 |    | 53  |    |
| BBK36 |       | Hypothetical protein                | 1.53 | 0.21 | 0.022 | Hypothetical proteins             |                                                                                 | +  | 66  | 76 |
| BBL39 | erpA  | ErpA protein                        | 1.37 | 0.11 | 0.006 | Cell envelope                     | Other                                                                           |    | 162 | 61 |
| BBL40 | erpB2 | ErpB2 protein                       | 0.69 | 0.08 | 0.018 | Cell envelope                     | Other                                                                           | +  | 163 | 18 |
| BBM16 |       | Hypothetical protein                | 0.76 | 0.05 | 0.008 | Hypothetical proteins             |                                                                                 |    | 157 | 40 |
| BBN26 |       | Outer surface protein, putative     | 0.81 | 0.04 | 0.003 | Cell envelope                     | Other                                                                           | +  | 143 | 54 |
| BBN28 | lp    | Lipoprotein                         | 0.65 | 0.06 | 0.006 | Cell envelope                     | Other                                                                           |    | 113 | 5  |
| BBO16 |       | Hypothetical protein                | 1.49 | 0.16 | 0.011 | Hypothetical proteins             |                                                                                 |    | 157 | 69 |
| BBO19 |       | Conserved hypothetical protein      | 1.53 | 0.10 | 6E-05 | Hypothetical proteins - Conserved | Conserved                                                                       | +  | 139 | 75 |
| BBO22 |       | Conserved hypothetical protein      | 1.34 | 0.08 | 0.003 | Hypothetical proteins - Conserved | Conserved                                                                       | +  | 142 | 58 |
| BBO23 | blyA  | Pore-forming hemolysin              | 1.64 | 0.19 | 0.005 | Cellular processes                | Toxin production and resistance                                                 | +  | 109 | 81 |
| BBO33 |       | Conserved hypothetical protein      | 0.69 | 0.05 | 0.004 | Hypothetical proteins - Conserved | Conserved                                                                       |    | 49  | 16 |
| BBO40 | erpM  | ErpM protein                        | 0.67 | 0.07 | 0.008 | Cell envelope                     | Other                                                                           |    | 163 | 8  |
| BBP32 |       | Plasmid partition protein, putative | 0.69 | 0.04 | 0.001 | Cellular processes                | Cell division                                                                   |    | 32  | 14 |
| BBQ27 |       | Conserved hypothetical protein      | 1.65 | 0.17 | 0.003 | Hypothetical proteins - Conserved | Conserved                                                                       | +  | 140 | 83 |
| BBQ53 |       | Hypothetical protein                | 1.44 | 0.11 | 0.002 | Hypothetical proteins             |                                                                                 |    | 148 | 66 |
| BBQ88 |       | Hypothetical protein                | 1.43 | 0.12 | 0.005 | Hypothetical proteins             |                                                                                 | +  | 76  | 65 |
| BBR04 |       | Hypothetical protein                | 1.43 | 0.13 | 0.006 | Hypothetical proteins             |                                                                                 |    | 148 | 64 |
| BBS12 |       | Hypothetical protein                | 0.70 | 0.08 | 0.021 | Hypothetical proteins             |                                                                                 | +  | 153 | 24 |
| BBS13 |       | Hypothetical protein                | 0.76 | 0.05 | 0.009 | Hypothetical proteins             |                                                                                 | +  | 154 | 42 |

\*Standard Error.

†*t*-test *P*-value indicating significant difference from ratio of 1.0.

‡Probe for this ORF has ≥ 80% identity to another probe on the array.

§Rank order, from lowest to highest, of mutant/WT ratio.

¶Taqman ratio of *rpoS* mutant/WT.
