# Supplementary material
Source: PubMed Central journal article supplement (PMC555983)
Supplement: pnas_102_14_5162__6.pdf [file pnas_102_14_5162__6.pdf]

**Table 6. Genes with significantly altered expression in *ntrA* and *rpoS* mutants relative to WT (regulatory group 3).**

| ORF    | Name  | Description                                       | <i>ntrA</i> /WT |      |                       | <i>rpoS</i> /WT |      |                       | Main role                                                  | Subrole                                              | Potential to cross-hybridize <sup>‡</sup> | Putative prom. <sup>§</sup> | Paralog. family no. | Rank <sup>¶</sup> | Taqman <sup>  </sup> <i>ntrA</i> /WT | Taqman <sup>  </sup> <i>rpoS</i> /WT |
|--------|-------|---------------------------------------------------|-----------------|------|-----------------------|-----------------|------|-----------------------|------------------------------------------------------------|------------------------------------------------------|-------------------------------------------|-----------------------------|---------------------|-------------------|--------------------------------------|--------------------------------------|
|        |       |                                                   | Ratio           | SE*  | <i>P</i> <sup>†</sup> | Ratio           | SE*  | <i>P</i> <sup>†</sup> |                                                            |                                                      |                                           |                             |                     |                   |                                      |                                      |
| BB0015 | udk   | Uridine kinase                                    | 1.59            | 0.20 | 0.01                  | 1.66            | 0.20 | 0.004                 | Purines, pyrimidines, nucleosides, and nucleotides         | Salvage of nucleosides and nucleotides               |                                           | Y                           |                     | 34,44             |                                      |                                      |
| BB0044 |       | Hypothetical protein                              | 1.59            | 0.14 | 9E-04                 | 1.74            | 0.18 | 3E-04                 | Hypothetical proteins                                      |                                                      |                                           | Y                           |                     | 35,47             |                                      |                                      |
| BB0084 | nifS  | NifS protein                                      | 1.61            | 0.17 | 0.002                 | 1.70            | 0.22 | 0.005                 | Biosynthesis of cofactors, prosthetic groups, and carriers | Other                                                |                                           | N                           |                     | 37,45             |                                      |                                      |
| BB0204 | hflC  | Lambda CII stability-governing protein            | 1.98            | 0.11 | 1E-06                 | 1.64            | 0.26 | 0.019                 | Protein fate                                               | Degradation of proteins, peptides, and glycopeptides |                                           | Y                           |                     | 50,42             |                                      |                                      |
| BB0232 |       | HbbU protein                                      | 1.33            | 0.04 | 2E-06                 | 1.75            | 0.24 | 0.008                 | Protein synthesis                                          | Nucleoproteins                                       |                                           | N                           |                     | 26,49             |                                      |                                      |
| BB0265 |       | Hypothetical protein                              | 0.70            | 0.06 | 0.006                 | 0.68            | 0.07 | 0.007                 | Hypothetical proteins                                      |                                                      |                                           | N                           |                     | 21,17             |                                      |                                      |
| BB0279 | fliL  | Flagellar protein                                 | 1.68            | 0.13 | 2E-04                 | 1.80            | 0.13 | 5E-06                 | Cellular processes                                         | Chemotaxis and motility                              |                                           | Y                           |                     | 43,50             |                                      |                                      |
| BB0287 | flbA  | Flagellar protein                                 | 1.40            | 0.07 | 2E-04                 | 1.62            | 0.26 | 0.023                 | Cellular processes                                         | Chemotaxis and motility                              |                                           | N                           |                     | 28,39             |                                      |                                      |
| BB0295 | hslU  | Heat shock protein                                | 0.57            | 0.06 | 0.002                 | 0.66            | 0.03 | 3E-05                 | Protein fate                                               | Protein folding and stabilization                    |                                           | Y                           | 127                 | 11,16             |                                      |                                      |
| BB0320 |       | Hypothetical protein                              | 1.68            | 0.10 | 5E-05                 | 1.70            | 0.24 | 0.005                 | Hypothetical proteins                                      |                                                      |                                           | Y                           |                     | 42,46             |                                      |                                      |
| BB0321 |       | Hypothetical protein                              | 1.73            | 0.11 | 3E-05                 | 1.46            | 0.13 | 0.004                 | Hypothetical proteins                                      |                                                      |                                           | N                           |                     | 45,33             |                                      |                                      |
| BB0334 | oppD  | Oligopeptide ABC transporter, ATP-binding protein | 1.55            | 0.05 | 4E-08                 | 1.48            | 0.17 | 0.013                 | Transport and binding proteins                             | Amino acids, peptides and amines                     |                                           | Y                           | 4                   | 32,34             |                                      |                                      |
| BB0337 | eno   | Enolase                                           | 1.42            | 0.06 | 9E-05                 | 1.37            | 0.13 | 0.016                 | Energy metabolism                                          | Glycolysis/ gluconeogenesis                          |                                           | N                           |                     | 29,29             |                                      |                                      |
| BB0428 |       | Hypothetical protein                              | 1.64            | 0.16 | 0.001                 | 1.64            | 0.12 | 2E-04                 | Hypothetical proteins                                      |                                                      |                                           | Y                           |                     | 39,41             |                                      |                                      |
| BB0548 | polA  | DNA polymerase I                                  | 0.69            | 0.05 | 0.002                 | 0.74            | 0.06 | 0.014                 | DNA metabolism                                             | DNA replication, recombination, and repair           |                                           | N                           |                     | 19,21             |                                      |                                      |
| BB0593 |       | Long-chain-fatty-acid CoA ligase                  | 1.48            | 0.11 | 0.002                 | 1.63            | 0.15 | 7E-04                 | Fatty acid and phospholipid metabolism                     | Degradation                                          |                                           | Y                           | 25                  | 31,40             |                                      |                                      |
| BB0597 | mcp-3 | Methyl-accepting chemotaxis protein               | 1.88            | 0.09 | 1E-07                 | 1.45            | 0.10 | 4E-04                 | Cellular processes                                         | Chemotaxis and motility                              |                                           | N                           | 13                  | 46,31             |                                      |                                      |
| BB0601 | glyA  | Serine hydroxymethyl-transferase                  | 1.42            | 0.07 | 1E-05                 | 1.62            | 0.15 | 9E-04                 | Amino acid biosynthesis                                    | Serine family                                        |                                           | Y                           |                     | 30,38             |                                      |                                      |

|        |       |                                                      |      |      |       |      |      |       |                                   |                                                                                 |   |     |       |      |      |
|--------|-------|------------------------------------------------------|------|------|-------|------|------|-------|-----------------------------------|---------------------------------------------------------------------------------|---|-----|-------|------|------|
| BB0617 |       | Hypothetical protein                                 | 1.93 | 0.25 | 0.003 | 1.56 | 0.11 | 2E-04 | Hypothetical proteins             |                                                                                 | N |     | 48,37 |      |      |
| BB0625 |       | <i>N</i> -acetylmuramoyl-L-alanine amidase, putative | 1.60 | 0.14 | 0.002 | 2.02 | 0.26 | 9E-04 | Cell envelope                     | Biosynthesis of murein sacculus and peptidoglycan                               | Y |     | 36,51 |      |      |
| BB0645 | ptsG  | PTS system, glucose-specific IIBC component          | 1.64 | 0.16 | 0.003 | 1.42 | 0.13 | 0.004 | Transport and binding proteins    | Carbohydrates, organic alcohols, and acids                                      | Y | 16  | 40,30 |      |      |
| BB0681 | mcp-5 | Methyl-accepting chemotaxis protein                  | 0.59 | 0.07 | 0.006 | 0.52 | 0.04 | 8E-05 | Cellular processes                | Chemotaxis and motility                                                         | Y | 13  | 12,8  |      |      |
| BB0816 |       | Hypothetical protein                                 | 2.13 | 0.37 | 0.005 | 1.52 | 0.15 | 0.002 | Hypothetical proteins             |                                                                                 | N |     | 51,36 |      |      |
| BB0825 |       | Hypothetical protein                                 | 1.93 | 0.25 | 0.002 | 1.30 | 0.07 | 5E-04 | Hypothetical proteins             |                                                                                 | N |     | 49,28 |      |      |
| BB0828 | topA  | DNA topoisomerase I                                  | 1.89 | 0.22 | 0.002 | 0.76 | 0.05 | 0.005 | DNA metabolism                    | DNA replication, recombination, and repair                                      | N |     | 47,23 |      |      |
| BB0836 | uvrB  | Excinuclease ABC, subunit B                          | 0.75 | 0.04 | 2E-04 | 0.62 | 0.05 | 6E-04 | DNA metabolism                    | DNA replication, recombination, and repair                                      | N |     | 25,12 |      |      |
| BB0844 |       | Hypothetical protein                                 | 0.73 | 0.04 | 0.002 | 0.75 | 0.06 | 0.008 | Hypothetical proteins             |                                                                                 | N | 12  | 24,22 |      |      |
| BBA08  |       | Conserved hypothetical protein                       | 1.71 | 0.18 | 0.002 | 1.65 | 0.14 | 2E-04 | Hypothetical proteins - Conserved | Conserved                                                                       | N | 139 | 44,43 |      |      |
| BBA25  | dbpB  | Decorin binding protein B                            | 0.24 | 0.04 | 4E-04 | 0.34 | 0.08 | 0.004 | Cell envelope                     | Other                                                                           | N | 74  | 1,2   | 0.07 | 0.13 |
| BBA36  |       | Lipoprotein                                          | 0.34 | 0.01 | 2E-07 | 0.43 | 0.06 | 0.001 | Cell envelope                     | Other                                                                           | N |     | 4,5   | 0.05 | 0.09 |
| BBA38  |       | Hypothetical protein                                 | 0.63 | 0.05 | 4E-04 | 1.45 | 0.18 | 0.022 | Hypothetical proteins             |                                                                                 | Y | 146 | 13,32 |      |      |
| BBA60  |       | Surface lipoprotein P27                              | 1.58 | 0.20 | 0.012 | 0.74 | 0.03 | 1E-04 | Cell envelope                     | Other                                                                           | N |     | 33,20 |      |      |
| BBA64  |       | Antigen, P35                                         | 0.27 | 0.04 | 3E-04 | 0.35 | 0.11 | 0.010 | Cell envelope                     | Biosynthesis and degradation of surface polysaccharides and lipopolysaccharides | Y | 54  | 3,3   |      |      |
| BBA65  |       | Hypothetical protein                                 | 0.39 | 0.03 | 8E-07 | 0.49 | 0.06 | 0.002 | Hypothetical proteins             |                                                                                 | Y | 54  | 5,7   |      |      |
| BBA66  |       | Antigen, P35, putative                               | 0.26 | 0.02 | 8E-08 | 0.25 | 0.03 | 8E-05 | Cell envelope                     | Biosynthesis and degradation of surface polysaccharides and lipopolysaccharides | Y | 54  | 2,1   |      |      |
| BBA71  |       | Hypothetical protein                                 | 0.66 | 0.06 | 0.004 | 0.65 | 0.08 | 0.013 | Hypothetical proteins             |                                                                                 | Y | 54  | 15,14 |      |      |
| BBA72  |       | Hypothetical protein                                 | 0.43 | 0.05 | 3E-04 | 0.47 | 0.03 | 2E-05 | Hypothetical proteins             |                                                                                 | N |     | 6,6   |      |      |
| BBB19  | ospC  | Outer surface protein C                              | 0.44 | 0.13 | 0.026 | 0.40 | 0.16 | 0.042 | Cell envelope                     | Other                                                                           | Y |     | 7,4   | 0.02 | 0.01 |
| BBB21  |       | Hypothetical protein                                 | 0.52 | 0.05 | 5E-04 | 0.54 | 0.14 | 0.05  | Hypothetical proteins             |                                                                                 | N |     | 8,9   |      |      |
| BBF28  |       | Hypothetical protein                                 | 1.66 | 0.20 | 0.008 | 1.75 | 0.15 | 2E-04 | Hypothetical proteins             |                                                                                 | N |     | 41,48 |      |      |
| BBI17  |       | Hypothetical protein                                 | 1.63 | 0.17 | 0.003 | 1.48 | 0.18 | 0.02  | Hypothetical proteins             |                                                                                 | Y |     | 38,35 |      |      |

|       |      |                                |      |      |       |      |      |       |                                   |   |   |     |       |
|-------|------|--------------------------------|------|------|-------|------|------|-------|-----------------------------------|---|---|-----|-------|
| BBM01 |      | Hypothetical protein           | 0.55 | 0.06 | 0.001 | 0.78 | 0.05 | 0.007 | Hypothetical proteins             |   | Y | 146 | 10,25 |
| BBM21 |      | Conserved hypothetical protein | 0.55 | 0.05 | 2E-04 | 0.71 | 0.04 | 0.001 | Hypothetical proteins - Conserved | + | N | 141 | 9,18  |
| BBM31 |      | Conserved hypothetical protein | 1.37 | 0.07 | 2E-04 | 1.26 | 0.04 | 5E-04 | Hypothetical proteins - Conserved | + | N | 50  | 27,27 |
| BBO39 | erpL | ErpL protein                   | 0.64 | 0.02 | 2E-07 | 0.56 | 0.07 | 0.006 | Cell envelope                     |   | Y | 164 | 14,10 |
| BBP33 |      | Conserved hypothetical protein | 0.68 | 0.02 | 5E-07 | 0.61 | 0.04 | 6E-05 | Hypothetical proteins - Conserved |   | N | 49  | 16,11 |
| BBP41 |      | Hypothetical protein           | 0.71 | 0.03 | 8E-05 | 0.74 | 0.02 | 5E-07 | Hypothetical proteins             | + | N | 115 | 22,19 |
| BBR06 |      | Conserved hypothetical protein | 0.70 | 0.05 | 0.003 | 0.84 | 0.02 | 1E-04 | Hypothetical proteins - Conserved |   | N | 149 | 20,26 |
| BBR26 |      | Conserved hypothetical protein | 0.69 | 0.03 | 2E-06 | 0.64 | 0.08 | 0.007 | Hypothetical proteins - Conserved | + | N | 143 | 18,13 |
| BBS44 |      | Hypothetical protein           | 0.72 | 0.03 | 8E-05 | 0.66 | 0.08 | 0.015 | Hypothetical proteins             |   | N | 115 | 23,15 |
| BBS45 |      | Conserved hypothetical protein | 0.69 | 0.04 | 0.001 | 0.77 | 0.05 | 0.003 | Hypothetical proteins - Conserved | + | Y | 145 | 17,24 |

\*Standard Error.

† *t*-test *P*-value indicating significant difference from ratio of 1.0.

‡ Probe for this ORF has ≥ 80% identity to another probe on the array.

§ Putative  $\sigma^{54}$ -dependent promoter upstream of this ORF. Y, putative promoter is present. N, no promoter found.

¶ Rank order, from lowest to highest, of *ntrA* mutant/WT, *rpoS* mutant/WT ratios.

|| Taqman ratio of indicated mutant/WT.
