# Supplementary material
Source: PubMed Central journal article supplement (PMC555983)
Supplement: pnas_102_14_5162__8.pdf [file pnas_102_14_5162__8.pdf]

**Table 7. Taqman primer and probe sequences for confirmation of microarray data**

| ORF    | Name  | Forward primer                 | Reverse primer                 | Probe                             |
|--------|-------|--------------------------------|--------------------------------|-----------------------------------|
| BB0002 |       | gaagcttttattgatggatgcagaa      | gtatctgtagttgtccccctaatcc      | atggagtattttcggcaatcaaacattttcctg |
| BB0003 |       | aaattaggcatctttaatgggtgct      | aattcatccggtttgcaactagta       | ttttgtggcaaaatgatcaagccctca       |
| BB0052 | spoU  | ccacatcttgaatcccaaatca         | ttacataaaatcagcagctcccaat      | tctgactaagccctgttaattcagtccca     |
| BB0109 | fadA  | gtttgtggttctgggctaagg          | tcttctaggaataaataaggagaattgggt | ccaagggaatagaattaatgaagctcca      |
| BB0147 | flaB  | ttctcaaaatgaagaacagctgaaga     | tggtttgcctcaacatgaactc         | tcacttcagggtctcaagcgtcttgac       |
| BB0416 | traB  | aaatactgaaggagaggcattattc      | taggtatttctcgagttctcaacgt      | atggcctgcaccacaatggca             |
| BB0420 |       | agattgcggaagccgctaa            | agtagccgcatattccggt            | agccaatgtcagtcagatattcgtaccctatt  |
| BB0427 |       | ggattatttgcaaaaggaaattct       | attggacaaaactttgatccctctca     | cccggagtaccagcatcgtaacaaaag       |
| BB0515 | trxB  | aaagggaagggttcagtaaat          | ttacaataagataaacctgtccaccaa    | caacactgcccttcagaatcaatttattaagca |
| BB0534 | exoA  | ggttatagtggtgttcatttattca      | agccccctaccctcattgtc           | tccaagcagccttacagagataggctcaact   |
| BB0613 | lon-2 | gcttcgatattgtctgacaagaagt      | taatgccgccacaggaa              | cacctcaccagtcattgcaagatccaaag     |
| BB0618 | cdd   | tcaaagtaggtgcctgattaagac       | tgcaatcatatttaaaatcgcacttc     | aacaagtgctccaaagcttgattctcaa      |
| BB0621 | thiJ  | ttccaaaggaagtttattgcagcta      | aaactggataacatgaaacttattgaatc  | cagcaagcactactaccggagaagcaca      |
| BB0628 |       | tgcaactgctgctcttttc            | ccgataaaaaataaaccaaacatctt     | atcggatgagatcccaatgtctgcca        |
| BB0647 | fur   | accctattcaactgacgatattaagat    | tgccctgagtaaatgattcaataga      | ttgtttcccagtttttccaagttgtctttc    |
| BB0728 | nox   | ttggcaacaacagccaacaa           | gtaagtctgttcttgagcttctaa       | tttaaggcacattgggtcagctcaa         |
| BB0797 | mutS  | agaagttgaagaaaagccatctcttaa    | cggcccaccaaactttctag           | ttatgttgcctgcatagcaggacttcct      |
| BB0834 | clpC  | tatgtcaaaaatttaacagcacttgca    | cacaccaggttcgcctattagc         | tctctgcttcttccaaccaaggggtct       |
| BB0840 |       | aaaatttcagatcttcaaatgaactgt    | attatcggaatcggcagttgac         | ttattcaaaaacatccccgccagaaga       |
| BBA07  | chpAI | aatgatgatcaaaaagaagctttggtt    | aaacacttaacaacagtaacaagcatttc  | tgaacaggtagttcttgatagcaatccccgaca |
| BBA25  | dbpB  | attcttgctatgtttgacttaatgc      | gcaatcttcagctgtgttatagga       | ttccaacgtctttagcagattctacaacctca  |
| BBA36  |       | tgacaatatttctagcattgtttctaaagc | agcctcccccttctattttta          | agcgacgccccactgagcaac             |
| BBB06  | celA  | caaatcaaaaatataaatgcaacaattg   | tttattaatcttgactgtggtgcaagt    | aaacaacgtcaaatcggtaacaactcgt      |
| BBB19  | ospC  | cggattctaatacggtttacttg        | caatagctttagcagcaatttcatct     | atgacagcaacgcttcaaccttttca        |
| BBE22  | pncA  | ttggcattgtaaaaatcatgtaagc      | ttaggaaattctgatcccaagatt       | ttgacgcagtgctcaggccaatac          |
| BBF33  | visE  | tctgcagttcgaaagtttagg          | tcactgaatcaccgactttcctt        | aactcagggcgtctcctattagcccagtaa    |
| BBS41  | ospG  | cagtctgtttaatccaccaccagta      | gcttcaccgcttttaatacg           | tgccggcaagttcccacgataaca          |
