# Supplementary material
Source: PubMed Central journal article supplement (PMC555983)
Supplement: pnas_102_14_5162__9.pdf [file pnas_102_14_5162__9.pdf]

**Table 8. Genes underexpressed in sigma factor mutants, but expressed or induced *in vivo*.**

| ORF    | Name   | Description                            | Main role                                          | Subrole                                    | Regulated by            | Ref.    |
|--------|--------|----------------------------------------|----------------------------------------------------|--------------------------------------------|-------------------------|---------|
| BB0038 |        | Hypothetical protein                   | Hypothetical proteins                              |                                            | $\sigma^{54}$           | 1       |
| BB0070 |        | Conserved hypothetical protein         | Hypothetical proteins - Conserved                  | Conserved                                  | $\sigma^S$              | 1       |
| BB0071 |        | Hypothetical protein                   | Hypothetical proteins                              |                                            | $\sigma^S$              | 1       |
| BB0376 | metK   | S-adenosylmethionine synthetase        | Central intermediary metabolism                    | Other                                      | $\sigma^S$              | 2       |
| BB0404 |        | Hypothetical protein                   | Hypothetical proteins                              |                                            | $\sigma^{54}$           | 3       |
| BB0450 | ntrA   | RNA polymerase sigma-54 factor         | Transcription                                      | DNA-dependent RNA polymerase               | $\sigma^{54}$           | 2       |
| BB0565 | cheW-2 | Purine-binding chemotaxis protein      | Cellular processes                                 | Chemotaxis and motility                    | $\sigma^S$              | 4       |
| BB0567 | cheA-1 | Chemotaxis histidine kinase            | Cellular processes                                 | Chemotaxis and motility                    | $\sigma^S$              | 4       |
| BB0606 |        | Conserved hypothetical protein         | Hypothetical proteins - Conserved                  | Conserved                                  | $\sigma^S$              | 1       |
| BB0614 |        | Hypothetical protein                   | Hypothetical proteins                              |                                            | $\sigma^S$              | 3       |
| BB0680 | mcp4   | Methyl-accepting chemotaxis protein    | Cellular processes                                 | Chemotaxis and motility                    | $\sigma^S$              | 2       |
| BB0681 | mcp-5  | Methyl-accepting chemotaxis protein    | Cellular processes                                 | Chemotaxis and motility                    | $\sigma^{54}, \sigma^S$ | 4       |
| BB0686 |        | Mevalonate pyrophosphate decarboxylase | Fatty acid and phospholipid metabolism             | Biosynthesis                               | $\sigma^{54}$           | 3       |
| BB0696 |        | Conserved hypothetical protein         | Hypothetical proteins - Conserved                  | Conserved                                  | $\sigma^S$              | 1       |
| BB0710 | dnaG   | DNA primase                            | DNA metabolism                                     | DNA replication, recombination, and repair | $\sigma^{54}$           | 3       |
| BB0758 |        | Lipoprotein, putative                  | Cell envelope                                      | Other                                      | $\sigma^S$              | 1       |
| BB0791 | tdk    | Thymidine kinase                       | Purines, pyrimidines, nucleosides, and nucleotides | Salvage of nucleosides and nucleotides     | $\sigma^S$              | 2       |
| BB0815 |        | Conserved hypothetical protein         | Hypothetical proteins - Conserved                  | Conserved                                  | $\sigma^S$              | 1       |
| BB0828 | topA   | DNA topoisomerase I                    | DNA metabolism                                     | DNA replication, recombination, and repair | $\sigma^S$              | 1       |
| BB0844 |        | Hypothetical protein                   | Hypothetical proteins                              |                                            | $\sigma^{54}, \sigma^S$ | 2, 4, 1 |
| BBA07  | chpAI  | ChpAI protein, putative                | Regulatory functions                               | Other                                      | $\sigma^{54}$           | 1       |
| BBA24  | dbpA   | Decorin binding protein A              | Cell envelope                                      | Other                                      | $\sigma^S$              | 1       |

|       |       |                                               |                                   |                                                                                 |                         |         |
|-------|-------|-----------------------------------------------|-----------------------------------|---------------------------------------------------------------------------------|-------------------------|---------|
| BBA25 | dbpB  | Decorin binding protein B                     | Cell envelope                     | Other                                                                           | $\sigma^{54}, \sigma^S$ | 3, 4, 1 |
| BBA36 |       | Lipoprotein                                   | Cell envelope                     | Other                                                                           | $\sigma^{54}, \sigma^S$ | 4, 1    |
| BBA57 |       | Hypothetical protein                          | Hypothetical proteins             |                                                                                 | $\sigma^{54}$           | 1       |
| BBA60 |       | Surface lipoprotein P27                       | Cell envelope                     | Other                                                                           | $\sigma^S$              | 1       |
| BBA64 |       | Antigen, P35                                  | Cell envelope                     | Biosynthesis and degradation of surface polysaccharides and lipopolysaccharides | $\sigma^{54}, \sigma^S$ | 2, 1    |
| BBA65 |       | Hypothetical protein                          | Hypothetical proteins             |                                                                                 | $\sigma^{54}, \sigma^S$ | 1       |
| BBA66 |       | Antigen, P35, putative                        | Cell envelope                     | Biosynthesis and degradation of surface polysaccharides and lipopolysaccharides | $\sigma^{54}, \sigma^S$ | 1       |
| BBA72 |       | Hypothetical protein                          | Hypothetical proteins             |                                                                                 | $\sigma^{54}, \sigma^S$ | 4       |
| BBB06 | celA  | PTS system, cellobiose-specific IIB component | Transport and binding proteins    | Carbohydrates, organic alcohols, and acids                                      | $\sigma^{54}$           | 2       |
| BBB09 |       | Hypothetical protein                          | Hypothetical proteins             |                                                                                 | $\sigma^{54}$           | 1       |
| BBB14 |       | Hypothetical protein                          | Hypothetical proteins             | Conserved                                                                       | $\sigma^{54}$           | 1       |
| BBB19 | ospC  | Outer surface protein C                       | Cell envelope                     | Other                                                                           | $\sigma^{54}, \sigma^S$ | 2, 4, 1 |
| BBF33 | vlsE  | Vmp-like sequence protein                     | Cell envelope                     | Other                                                                           | $\sigma^{54}$           | 4, 1    |
| BBG19 |       | Hypothetical protein                          | Hypothetical proteins - Conserved | Conserved                                                                       | $\sigma^S$              | 2       |
| BBI42 |       | Outer membrane protein, putative              | Cell envelope                     | Other                                                                           | $\sigma^{54}$           | 1       |
| BBJ23 |       | Hypothetical protein                          | Hypothetical proteins             |                                                                                 | $\sigma^{54}$           | 2, 4    |
| BBL15 |       | Hypothetical protein                          | Hypothetical proteins             |                                                                                 | $\sigma^{54}$           | 4       |
| BBL19 |       | Conserved hypothetical protein                | Hypothetical proteins             | Conserved                                                                       | $\sigma^{54}$           | 3       |
| BBL40 | erpB2 | ErpB2 protein                                 | Cell envelope                     | Other                                                                           | $\sigma^S$              | 4, 1    |
| BBN19 |       | Conserved hypothetical protein                | Hypothetical proteins             | Conserved                                                                       | $\sigma^{54}$           | 3       |
| BBN23 | blyA  | Pore-forming hemolysin                        | Cellular processes                | Toxin production and resistance                                                 | $\sigma^{54}$           | 3       |
| BBN28 |       | Lipoprotein                                   | Cell envelope                     | Other                                                                           | $\sigma^S$              | 3       |
| BBO04 |       | Hypothetical protein                          | Hypothetical proteins             |                                                                                 | $\sigma^{54}$           | 3       |
| BBO08 |       | Conserved hypothetical protein                | Hypothetical proteins             | Conserved                                                                       | $\sigma^{54}$           | 3       |
| BBO33 |       | Conserved hypothetical protein                | Hypothetical proteins - Conserved | Conserved                                                                       | $\sigma^S$              | 3       |
| BBO36 |       | Conserved hypothetical protein                | Hypothetical proteins             | Conserved                                                                       | $\sigma^{54}$           | 3       |
| BBO37 |       | Conserved hypothetical protein                | Hypothetical proteins             | Conserved                                                                       | $\sigma^{54}$           | 3       |
| BBO39 | erpL  | ErpL protein                                  | Cell envelope                     | Other                                                                           | $\sigma^{54}, \sigma^S$ | 1       |
| BBO43 |       | Hypothetical protein                          | Hypothetical proteins             |                                                                                 | $\sigma^{54}$           | 3       |
| BBP02 |       | Hypothetical protein                          | Hypothetical proteins             |                                                                                 | $\sigma^{54}$           | 3       |

|       |      |                                            |                       |           |               |   |
|-------|------|--------------------------------------------|-----------------------|-----------|---------------|---|
| BBP09 |      | Conserved hypothetical protein             | Hypothetical proteins | Conserved | $\sigma^{54}$ | 3 |
| BBP21 |      | Conserved hypothetical protein             | Hypothetical proteins | Conserved | $\sigma^{54}$ | 3 |
| BBQ51 |      | Hypothetical protein, authentic frameshift | Hypothetical proteins |           | $\sigma^{54}$ | 3 |
| BBS41 | ospG | Outer surface protein G                    | Cell envelope         | Other     | $\sigma^{54}$ | 1 |

---

1. Liang, F. T., Nelson, F. K. & Fikrig, E. (2002) *J. Exp. Med.* **196**, 275-280.
2. Brooks, C. S., Hefty, P. S., Jolliff, S. E. & Akins, D. R. (2003) *Infect. Immun.* **71**, 3371-3383.
3. Narasimhan, S., Camaino, M. J., Liang, F. T., Santiago, F., Laskowski, M., Philipp, M. T., Pachner, A. R., Radolf, J. D. & Fikrig, E. (2003) *Proc. Natl. Acad. Sci. USA* **100**, 15953-15958.
4. Revel, A. T., Talaat, A. M. & Norgard, M. V. (2002) *Proc. Natl. Acad. Sci. USA* **99**, 1562-1567.
