# Supplementary material
Source: PubMed Central journal article supplement (PMC555983)

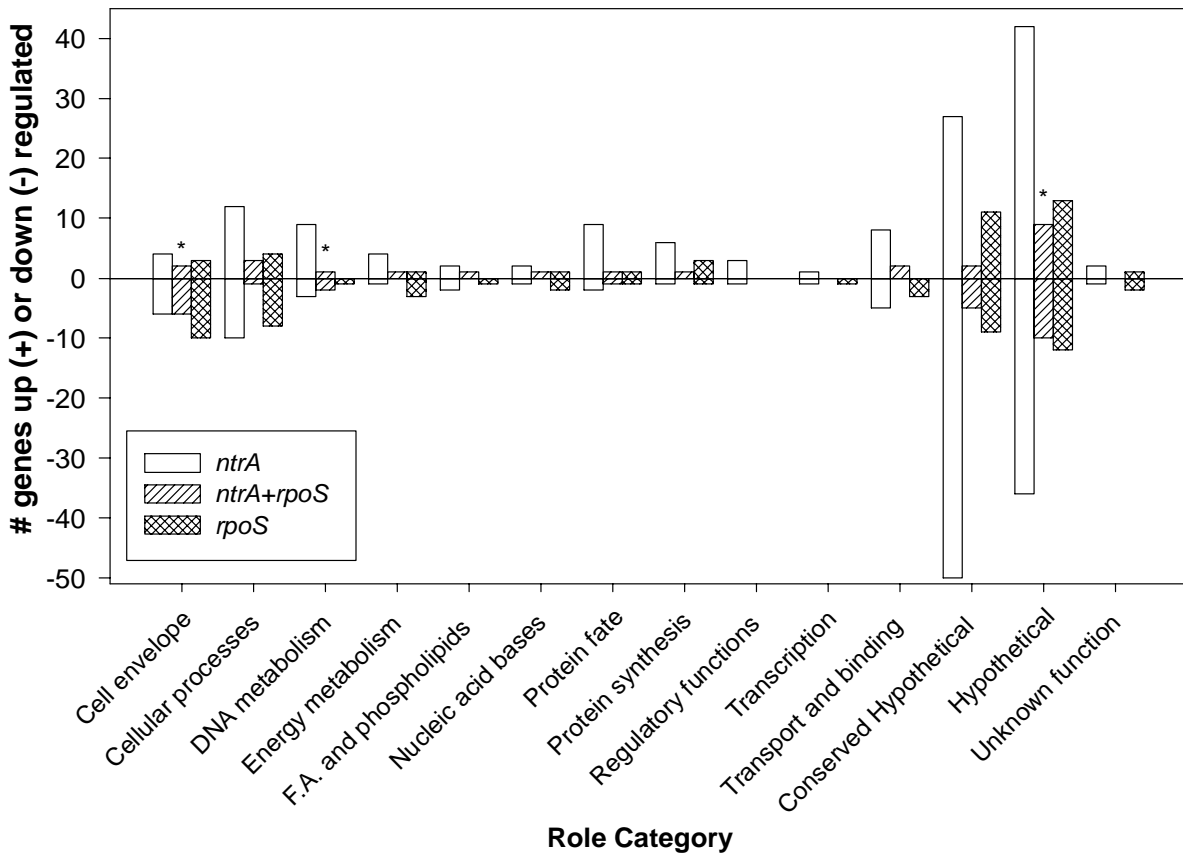

Supplement: pnas_102_14_5162__7.pdf [file pnas_102_14_5162__7.pdf]
